# Supplementary material for: Synergistic targeting and resistance to PARP inhibition in DNA damage repair-deficient pancreatic cancer
Source: PubMed Central journal article supplement — Gut. 2020 Sep 1;70(4):743–60. doi: 10.1136/gutjnl-2019-319970 (PMC7948173; doi:10.1136/gutjnl-2019-319970), 2020-09-01
Supplement: gutjnl-2019-319970supp001.pdf [file gutjnl-2019-319970supp001.pdf]

## 1 Synergistic targeting and resistance to PARP inhibition in DNA damage repair- 2 deficient pancreatic cancer 3 4

### 5 SUPPLEMENTARY METHODS 6

#### 7 Ethics statement

8 All animal care and procedures followed German or Spanish legal regulations and were previously approved  
9 by the respective governmental review board of the state of Baden-Württemberg (Permission no. 1369,  
10 1273, O.195-7, and 1347), of the state of Nordrhein-Westfalen (Permission no. 8.87-50.10.32.09.018), the  
11 state of Lower Saxony (Permission no. 33.19-42502-04-17/2407), the Universidad Autónoma de Madrid  
12 Ethics Committee (CEI 60-1057-A068 and CEI 103-1958-A337), and La Comunidad de Madrid (PROEX 335/14  
13 and PROEX 294/19). All mouse work aspects were carried out following strict guidelines to insure careful,  
14 consistent and ethical handling of mice. The biomaterial used was provided by the biobank of the University  
15 Hospital of Ulm following the regulations of the Biobank and the vote of the Ethics Committee of the  
16 University of Ulm (PDAC Liver Metastasis): 72/2019 (human tissue and blood), by the Ruhr University Bochum  
17 following the regulations and the vote of the Ethics Committee of the Ruhr University Bochum (Permission  
18 no. 3534-9 and 3841-10), by the University Medical Center Göttingen (Approval no. 11/5/17), and by the NYU  
19 Langone Health following the regulations and the guidelines of the NYU Institutional Review Board  
20 (Permission no. S16-00122). Some PDAC patient-derived xenografts were obtained from Dr. Manuel Hidalgo  
21 under a Material Transfer Agreement with the Spanish National Cancer Centre (CNIO), Madrid, Spain  
22 (Reference no. I409181220BSMH and I405271505PHMH).  
23

#### 24 Mice

25 *Atm<sup>fl/fl</sup>*, *Trp53<sup>fl/fl</sup>*, *LSL-Kras<sup>G12D/+</sup>* and *Ptf1a<sup>Cre/+</sup>* were previously described [1, 2, 3, 4]. Eight-week-old female  
26 Hsd:Athymic Nude-*Foxn1<sup>nu</sup>* mice were purchased from Envigo. Mice were housed and bred in a conventional  
27 health status-controlled animal facility. All animal care and procedures followed German legal regulations  
28 and were previously approved by the governmental review board of the state of Baden-Württemberg. All  
29 the aspects of the mouse work were carried out following strict guidelines to insure careful, consistent and  
30 ethical handling of mice.  
31

#### 32 Cell culture

33 *LSL-Kras<sup>G12D/+</sup>*; *Ptf1a<sup>Cre/+</sup>* (KC) and *Atm<sup>fl/fl</sup>*; *LSL-Kras<sup>G12D/+</sup>*; *Ptf1a<sup>Cre/+</sup>* (AKC) cells were respectively isolated from  
34 *LSL-Kras<sup>G12D/+</sup>*; *Ptf1a<sup>Cre/+</sup>* and *Atm<sup>fl/fl</sup>*; *LSL-Kras<sup>G12D/+</sup>*; *Ptf1a<sup>Cre/+</sup>* mice and immortalized as described previously  
35 [5]. Cells were cultured in DMEM, containing 10% FBS and P/S (100 IU/mL penicillin and 100 µg/mL

36 streptomycin sulfate). MIA PaCa-2 (ATCC CRL-1420) and PANC-1 (ATCC CRL-1469) cells were purchased from  
37 the ATCC and were cultured in DMEM, containing 10% FBS and P/S.

38 Organoids were isolated as previously described [6]. Briefly, cryopreserved tumors from patients were  
39 digested with accutase (Sigma-Aldrich) for 30 min at 37°C. Cells were then filtered through an 100 µm filter  
40 and seeded on a Matrigel GFR (Corning)-coated plate in organoid culture medium containing WNT-3/RSP01-  
41 conditioned medium [7] and 5% Matrigel GFR.

42 To generate PARPi-resistant AKC (R-AKC) cell lines, AKC cells at 70% confluence were treated with olaparib,  
43 respectively at their half maximal inhibitory concentration (IC<sub>50</sub>). Cells were passaged when they reached 70-  
44 90% of confluence. Upon every passage, cells were then treated with incremental increasing doses of  
45 olaparib, until cells were able to grow in the presence of olaparib at a concentration of 5 times the IC<sub>50</sub> (18.5  
46 µM).

47 All cells were propagated at 37°C under 5% (v/v) CO<sub>2</sub> atmosphere. All experiments were performed between  
48 passage 5 and 15. Mycoplasma tests were regularly performed using the Mycoprobe mycoplasma detection  
49 kit (R&D Systems).

50 5-fluorouracil (NSC 19893), adavosertib (MK-1775), AZD0156, AZD7762, carboplatin (JM-8), CC-115,  
51 clarithromycin (A-56268), cisplatin, dabrafenib (GSK2118436), decitabine, doxorubicin (adriamycin),  
52 elacridar (GW120918), etoposide, everolimus (RAD001), gemcitabine (LY188011), irinotecan (CPT-11), KU-  
53 60019, lapatinib (GSK572016), mirin, mitomycin C, N-acetylcystein, niraparib (MK-4827), NU7026  
54 (LY293646), oxaliplatin (L-OHP), paclitaxel (NSC 125973), palbociclib (PD-0332991), pemetrexed (LY-231514),  
55 olaparib (AZD2281, KU-00594), PD0325901, PD-1/PD-L1 inhibitor 1, pevonedistat (MLN4924), SCR7,  
56 selumetinib (AZD6244), sorafenib (BAY 43-9006), sunitinib (SU11248), tivantinib (ARQ 197), trametinib  
57 (GSK1120212), VE-821, VE-822 (VX970), venetoclax (ABT-199), vinorelbine, vorinostat (SAHA) and  
58 wortmannin were purchased from Selleckchem. Dorsomorphin, LDN193189, L67, and metformin were  
59 purchased from Sigma-Aldrich. Erlotinib was purchased from LC Laboratories. JAK inhibitor I was purchased  
60 from EMD Millipore. PI-103 was purchased from Tocris. SB431542 was purchased from Axon.

61

## 62 **Cytotoxicity assay**

63 Prior to seeding, patient-derived organoids were dissociated into single cells using collagenase/dispase and  
64 accutase. Organoids were then seeded in 96 well-plates (2,000 cells per well) for four days before treatment.  
65 After four additional days of treatment, cell viability was analyzed with the CytoTox-Glo™ Cytotoxicity Assay  
66 (Promega) according to the manufacturer's protocol. Luminescence was measured using a Tecan Infinite  
67 M200 Pro. Cell death ratio (CDR) was determined using this formula:  $CDR = (S1:S2)Drug / (S1:S2)Vehicle$ .  
68 Percentage of survival was determined using this formula:  $(S2-S1)Drug / (S2-S1)Vehicle$ . Data are represented  
69 as mean ± SD of two independent experiments.

70

## 71 **Colony formation assay**

72 Cells were seeded in 12-well plates (1,000 cells per well). Twenty-four hours after seeding, cells were treated  
73 for three days. After further culturing for seven days, cells were fixed with methanol and stained with 5%  
74 Giemsa.

75

#### 76 **Migration assays**

77 For transwell migration assay,  $2 \times 10^5$  cells were seeded in serum-free medium in the upper chamber of  
78 transwells with 8  $\mu\text{m}$  pore size membrane (24-well format, Falcon) and complete medium in the lower  
79 chamber. After 24 h, cells were fixed with cold 4% formaldehyde and stained with DAPI and 5% Giemsa. Cells  
80 migrating to the membrane lower side were counted using ImageJ software (National Institutes of Health).

81

#### 82 **qPCR**

83 Total RNAs were extracted using the RNeasy Mini Kit (Qiagen). First-strand cDNAs were prepared using 250  
84 ng of RNA and SuperScript II Reverse Transcriptase in the presence of random primers (Thermo Fisher  
85 Scientific) according to the manufacturer's protocol. Quantitative PCR were performed using an Applied  
86 Biosystems QuantStudio 3 System (annealing temperature 60°C) and PowerUp SYBR Green Master Mix  
87 (Thermo Fisher Scientific). As described previously [8], all the real-time values were averaged and compared  
88 using the threshold cycle (CT) method, where the amount of target RNA ( $2^{-\Delta\Delta\text{CT}}$ ) was normalized to the  
89 endogenous expression of *18S* or *HPRT* ( $\Delta\text{CT}$ ). The amount of target mRNA in control cells was set as the  
90 calibrator at 1.0. Primers used for quantitative RT-PCR were purchased from Biomers, Qiagen and Sigma-  
91 Aldrich and listed in Supplementary Table 2.

92

#### 93 **Immunostaining**

94 Cells were grown on glass coverslips, fixed in 4% formaldehyde at 4°C, and permeabilized with 0.05%  
95 Tween20 for 15 min before immunofluorescence experiments. F-actin was stained with phalloidin-Atto565  
96 (1:500; Sigma-Aldrich). DNA was stained with DAPI (1  $\mu\text{g}/\text{mL}$ ; Sigma-Aldrich). Primary and secondary  
97 antibodies are listed in Table 2. Images were obtained at ambient temperature using an oil immersion  
98 objective (Plan-Neofluar 100 $\times$ /1.3 oil M27; Carl Zeiss) mounted on a Zeiss Axio Imager Z1 fluorescence  
99 microscope (Carl Zeiss) equipped with an AxioCam MRm camera and AxioVision LE imaging software (Carl  
100 Zeiss).

101 For nuclear aberration (micronucleus and multinucleated cell) quantification, a minimum of 200 cells per  
102 condition were counted. For anaphase bridge quantification, a minimum of 20 anaphases per condition were  
103 counted. Concerning the quantification of H2AX p-S139 foci-positive cells, a minimum of 400 cells per  
104 condition were counted. All cell countings were performed on at least 20 random pictures per condition.  
105 Data are represented as mean  $\pm$  SD of two independent experiments performed in two independent KC cell  
106 lines and two independent AKC cell lines.

107 All histological experiments were performed as previously described [8]. Primary and secondary antibodies  
108 are listed in Table 3. Bright-field images were obtained using a HCX PL APO 40×/0.85 (Leica) objective  
109 mounted on a Leica DM5500 B microscope equipped with a Leica DFC420C camera and Leica Application  
110 Suite software (Leica). Acquired pictures were subsequently analyzed using ImageJ software. Cleaved  
111 caspase-3-positive areas were normalized to total surface to calculate the respective percentage occupied  
112 by positive staining per field. For H2AX p-S139-positive cells quantification, a minimum of 5,000 cells per  
113 condition were counted. All quantifications were performed on at least three random pictures of all  
114 subcutaneous grafts ( $n \geq 4$  per condition) included in the study and on at least three random pictures of  $\geq 3$   
115 patient-derived xenografts. All analyzed pictures were carefully checked by eye to exclude artifacts and false  
116 positive areas. Data are represented as mean  $\pm$  SEM.

117 For RAD51 immunofluorescence staining evaluation, KC and AKC cells were treated for 48 h with PAD (PARPi,  
118 1  $\mu$ M olaparib; ATRi, 20 nM VE-822; DNA-PKi, 30 nM CC-115). Pre-extraction for 1 min was followed by 10  
119 min fixation with 3.7% formaldehyde at RT. Before the staining, cells were permeabilized with 0.5% Triton  
120 for 12 min and blocked with 5% goat serum for 1 h at room temperature. Cells were then incubated 1 h at  
121 37°C with primary antibodies: anti-RAD51 (1:500, Santa Cruz Biotechnology, clone H-92, sc-8349) and anti-  
122 Cyclin A2 (1:100, Abcam, clone E67.1, ab39). Finally, the cells were stained with secondary antibodies either  
123 conjugated with AlexaFluor555 (1:1,000, anti-rabbit, Invitrogen) and AlexaFluor488 (1:2,000, anti-mouse,  
124 Invitrogen). Images were acquired with the Keyence BZ 9000 microscope (Keyence) with 100× oil immersion  
125 objective. Foci quantification was carried out with a Keyence BZ II Analyzer software. Data are represented  
126 as mean  $\pm$  SEM of two independent experiments evaluating 182-372 nuclei in each experiment, whereby  
127 RAD51 foci scores were obtained in two independent KC cell lines and two independent AKC cell lines.

128

#### 129 **Double-strand break repair assay**

130 Assay conditions were performed as previously described [9] using the repair substrates developed in [10,  
131 11]. Recombination frequencies were calculated by dividing the green fluorescent cell counts per life cell  
132 count by the corresponding transfection efficiency. Data are represented as mean  $\pm$  SEM and correspond to  
133 six measurements from two independent experiments each, whereby measurements were performed in two  
134 independent KC cell lines and two independent AKC cell lines.

135

#### 136 **Metaphase spreads**

137 Cells were prepared as previously described [12]. For each condition, a minimum of 30 metaphases were  
138 evaluated regarding chromosome number, ring chromosome, chromatid break, gap and fragment, and  
139 chromatid monocentric and dicentric fusions.

140

#### 141 **Complete blood count**

142 Blood was collected from the facial vein in EDTA-coated microvette tubes (Sarstedt) and analyzed in a  
143 Hemavet 950FS (Drew Scientific) whole blood counter. For each group,  $\geq 3$  mice were enrolled. Data are  
144 represented as mean  $\pm$  SEM.

145

#### 146 **Flow cytometry**

147 For cell cycle analysis by flow cytometry, cells were fixed in cold 70% ethanol at 4°C for 30 min, washed with  
148 PBS and then resuspended in a solution containing RNase A (2 mg/mL) and DAPI (40  $\mu$ g/mL).

149 After harvesting cells by trypsinization, DNA damage analyses by flow cytometry were performed using the  
150 Apoptosis, DNA damage and Cell Proliferation kit (BD Pharmingen) according to the manufacturer's  
151 instructions. Samples were subjected to flow cytometry ( $2 \times 10^4$  cells were acquired) on a Becton Dickinson  
152 LSR II equipped with BD FACSDIVA (BD Biosciences) and analyzed with FlowJo (FlowJo, LLC) software. Data  
153 are represented as mean  $\pm$  SEM of three independent experiments performed in two independent KC cell  
154 lines and two independent AKC cell lines.

155 Bone marrow was flushed from femurs of treated mice with ice-cold Hank's balanced salt solution (HBSS,  
156 Thermo Fisher Scientific) using a 23-gauge needle, followed by passage through a 70  $\mu$ m sterile nylon cell  
157 strainer (Sigma-Aldrich). Blood was collected as described above. For the removal of red blood cells, blood  
158 and bone marrow preparations were incubated in 10 mL red cell lysis buffer (144 mM  $\text{NH}_4\text{Cl}$ , 17 mM Tris, pH  
159 7.2) for 5 min, at room temperature. Staining of cells was performed in FACS buffer (PBS, 0.3% (w/v) BSA and  
160 0.1% (w/v)  $\text{NaN}_3$ ). Non-specific binding of antibodies to Fc-receptors was blocked by pre-incubating cells with  
161 mAb 2.4G2 (BD Biosciences) directed against the Fc $\gamma$ RIII/II CD16/CD32 (0.5  $\mu$ g mAb/ $10^6$  cells/100  $\mu$ L). Marker  
162 combinations used for the different cell types are shown in Supplementary Table 4 and used antibodies are  
163 listed in Supplementary Table 5. Frequencies of living single cells grouping to the respective subpopulations  
164 were determined by flow cytometry using a BD LSR-II Flow Cytometer (BD Biosciences) and FCS Express V3  
165 (DeNovo) software. For each group,  $\geq 3$  mice were enrolled. Data are represented as mean  $\pm$  SEM.

166

#### 167 **Western blotting**

168 Total protein extracts were prepared using RIPA lysis buffer (50 mM Tris, pH 7.5, 150 mM NaCl, 1% Nonidet  
169 P-40, 0.5% sodium deoxycholate, 0.1% SDS and commercial protease and phosphatase inhibitor cocktail  
170 tablets (Roche)) and were subjected to electrophoresis on SDS/PAGE. Chromatin-bound protein extracts  
171 were prepared as previously described [13]. Protein extracts (40  $\mu$ g) were subjected to electrophoresis on  
172 SDS/PAGE. The separated proteins were transferred onto PVDF membranes (Millipore) by electroblotting.  
173 Western blots were revealed using the SuperSignal West Dura Extended Duration Substrate (Pierce). Primary  
174 and secondary antibodies are listed in Table 3.

175

#### 176 **Chicken chorioallantoic membrane assays**

177 Chicken chorioallantoic membrane (CAM) assays were performed as previously described [14]. Briefly,  $1 \times$   
178  $10^6$  KC and AKC cells in 1:1 serum-free DMEM:Matrigel GFR were xenografted onto chicken CAM 8 days post-  
179 fertilization (within 5-mm silicon rings), and irinotecan 50 mg/kg or vehicle was applied topically on days 9  
180 and 10. Three days after treatment initiation, xenografts were explanted, fixed in 5% PFA, and processed for  
181 histopathological examination. Tumor surface ( $\text{mm}^2$ ) was evaluated using ImageJ software and normalized  
182 to the area of the silicon ring. For each group,  $\geq 9$  xenografts were implanted. Data are represented as mean  
183  $\pm$  SD.

184

### 185 Subcutaneous assay

186 Cells were implanted by subcutaneous injection of  $1 \times 10^6$  cells in 100  $\mu\text{L}$  of 1:1 serum-free DMEM:Matrigel  
187 GFR into the flank of eight-week-old (24-26 g body weight) female Hsd:Athymic Nude-*Foxn1*<sup>nu</sup> mice. Tumor  
188 take was  $> 85\%$  for all cell lines. Tumor size was measured thrice a week with a caliper, and the tumor volumes  
189 were determined with the following equation:  $v = (l \times w^2) \times \pi / 6$  (where  $v$  is volume,  $l$  is length and  $w$  is  
190 width). For each group,  $\geq 8$  allografts were implanted. Data are represented as mean  $\pm$  SEM. Tumors were  
191 randomized when the volume reached 80 to 150  $\text{mm}^3$  before starting treatment.

192 For KC and AKC allograft experiment, a solution of olaparib, VE-822 and CC-115 (PAD: PARP inhibitor, ATR  
193 inhibitor and DNA-PK inhibitor; respectively, 50.0 mg/kg, 20.0 mg/kg and 2.5 mg/kg Q2D $\times$ 5) or irinotecan (50  
194 mg/kg Q3D $\times$ 3) were administered by i.p. injection. For MIA PaCa-2 xenograft experiment, a solution of PAD  
195 (olaparib 50.0 mg/kg, VE-822 20.0 mg/kg and CC-115 2.5 mg/kg Q2D $\times$ 13 for *ATM*<sup>+/Δ</sup> and Q2D $\times$ 12 for *ATM*<sup>+/+</sup>)  
196 and a solution of AZD0156 (ATM inhibitor; 2.25 mg/kg Q6D $\times$ 4) were administered by i.p. injection. Body  
197 weight progression data are represented as mean  $\pm$  SEM.

198 Measurements and injections were performed blindly. Mice were euthanized after 8 (KC and AKC cells) and  
199 25 (MIA PaCa-2 cells) days of therapy or when tumors reached a maximal volume of 1,000  $\text{mm}^3$ . Tumors were  
200 then resected and fixed in cold 4% formaldehyde for 24 h and embedded in paraffin for histological analysis.

201

### 202 Patient-derived xenografts

203 For subcutaneous implantation, 4  $\text{mm}^3$  pieces of patient-derived xenografts (patient-derived *in vivo*  
204 expanded pancreatic tumors), were embedded in ECM Gel from Engelbreth-Holm-Swarm murine sarcoma  
205 (Sigma-Aldrich) and transplanted into the flank of eight- to twelve-week-old (24-26 g body weight) female  
206 Hsd:Athymic Nude-*Foxn1*<sup>nu</sup> mice. Tumor take was  $\geq 80\%$  for all patient-derived xenografts. Tumor size was  
207 measured thrice a week with a caliper, and the tumor volumes were determined with the following equation:  
208  $v = (l \times w^2) \times \pi / 6$  (where  $v$  is volume,  $l$  is length and  $w$  is width). For each group,  $\geq 5$  patient-derived xenografts  
209 were implanted. Data are represented as mean  $\pm$  SEM. Tumors were randomized when the volume reached  
210 40 to 60  $\text{mm}^3$  before starting treatment. A solution of PAD (olaparib 50.0 mg/kg, VE-822 20.0 mg/kg and CC-  
211 115 2.5 mg/kg, every second day) and a solution of AZD0156 (ATM inhibitor; 2.25 mg/kg, every sixth day)  
212 were administered by i.p. injection. Measurements and injections were performed blindly. Mice were

213 euthanized when tumors reached a maximal volume of 400 mm<sup>3</sup>. Tumors were then resected and fixed in  
214 cold 4% formaldehyde for 24 h and embedded in paraffin for histological analysis.

215

#### 216 **Analysis of publicly available databases**

217 We conducted analyzes of DDR gene alteration frequency in human primary pancreatic adenocarcinoma  
218 (PDAC) using the cBioPortal platform (<http://www.cbioportal.org/>) [15, 16]. For this analysis, we queried  
219 Pancreatic Adenocarcinoma (QCMG, Nature 2016) [17], Pancreatic Adenocarcinoma (TCGA, Provisional) [18],  
220 and Pancreatic Cancer (UTSW, Nat Commun 2015) [19] sequencing data sets (751 tumor samples). Of note,  
221 patient TCGA-IB-7651 was excluded from the analysis due to artificial high mutation load (1,432 single  
222 nucleotides variants). *ATM* alterations and their localizations were analyzed with cBioPortal on the same  
223 datasets. Analyzes were performed with publicly available data sets on the 7/23/2019.

224 To conduct analysis of DDR gene alterations on a PanCancer study, we queried sequencing data set from  
225 MSK-IMPACT Clinical Sequencing Cohort (MSKCC, Nat Med 2017) (10,945 tumor samples) using the  
226 cBioPortal platform. This analysis was performed with the publicly available data set on the 4/6/2019.

227

#### 228 **RNA-sequencing**

229 Library preparation for bulk 3'-sequencing of poly(A)-RNA was done as described previously [20]. Briefly,  
230 barcoded cDNA of each sample was generated with a Maxima RT polymerase (Thermo Fisher Scientific) using  
231 oligo-dT primer containing barcodes, unique molecular identifiers (UMIs) and an adapter. 5' ends of the  
232 cDNAs were extended by a template switch oligo (TSO); after pooling of all samples, full-length cDNA was  
233 amplified with primers binding to the TSO-site and the adapter. cDNA was tagmented with the Nextera XT  
234 kit (Illumina) and 3'-end-fragments finally amplified using primers with Illumina P5 and P7 overhangs. In  
235 comparison to Parekh et al. [20], the P5 and P7 sites were exchanged to allow sequencing of the cDNA in  
236 read1 and barcodes and UMIs in read2 to achieve a better cluster recognition. The library was sequenced on  
237 a NextSeq 500 (Illumina) with 75 cycles for the cDNA in read1 and 16 cycles for the barcodes and UMIs in  
238 read2. Gencode gene annotations version M18 and the mouse reference genome major release GRCh38  
239 were derived from the Gencode homepage (<https://www.encodegenes.org/>). Dropseq tools v1.12 [21] was  
240 used for mapping the raw sequencing data to the reference genome. The resulting UMI filtered countmatrix  
241 was imported into R v3.4.4. Prior differential expression analysis with DESeq2 1.18.1 [22], dispersion of the  
242 data was estimated with a parametric fit including the treatment the cell lines underwent as explanatory  
243 variable in the model. The Wald test was used for determining differentially regulated genes between the  
244 treated and non-treated group and shrunken log<sub>2</sub> fold changes were calculated afterward, with setting the  
245 type argument of the lfcShrink function to normal. A gene was determined to be differentially regulated if  
246 the absolute log<sub>2</sub> fold change was greater than 0.848 or lower than -0.848 and the adjusted *p*-value was  
247 below 0.05.

248



**249 Exome sequencing**

250 Genomic DNA isolation was isolated from cell pellets and tail samples using the DNeasy Blood & Tissue Kit  
251 (Qiagen), according to the manufacturer's instructions. DNA concentration was fluorimetrically determined  
252 using the Qubit 3.0 system (Thermo Fisher Scientific). Library for Whole Exome Sequencing were prepared  
253 using the SureSelect<sup>XT</sup> Mouse All Exon kit (Agilent), following the manufacturer's instructions. Samples were  
254 sequenced on an Illumina NovaSeq 6000 sequencer, resulting in a median targeted coverage of ~80. The  
255 GATK Best Practice suggestions were followed for alignment and mutation calling. After read trimming using  
256 Trimmomatic 0.38 (LEADING:25 TRAILING:25 MINLEN:50), BWA-MEM 0.7.17 was used to align reads to the  
257 mouse reference genome (GRCh38.p6). Picard 2.18.26 and GATK 4.1.0.0 were used for postprocessing  
258 (CleanSam, MarkDuplicates, BaseRecalibrator) using default settings. Somatic mutations were called using  
259 MuTect2 v4.1.0.0. Mutations with at least two reads supporting the alternate allele and a base coverage of  
260 at least 10 in the tumor and germline were kept. Single nucleotide variants (SNVs) and insertions/deletions  
261 (Indels)  $\leq$  10 base pairs were annotated using SnpEff 4.3t, based on ENSEMBL 92. Copywriter 2.6.1.2 was  
262 used for the detection of copy number variations.

263

**264 Gene term enrichment analysis**

265 Gene ontology (GO) enrichment analysis and pathway enrichment analysis in DEGs were conducted using  
266 the annotation tool DAVID v6.8 (<http://david.abcc.ncifcrf.gov>) [23, 24] and the hallmark data sets from the  
267 Molecular signatures database v6.2 (MSigDB, Broad Institute;  
268 <http://software.broadinstitute.org/gsea/msigdb>). Significant enrichments are defined with FDR < 0.10 and  $p$   
269 < 0.05.

270

**271 Statistical analysis**

272 GraphPad Prism software was used for statistical analysis. For cell viability assays, cytology and histology  
273 quantifications, migration assays, flow cytometry experiments, chorioallantoic membrane assays, allograft,  
274 xenograft, and patient-derived xenograft subcutaneous experiments in *Nude* mice, qRT-PCR and, western  
275 blot quantifications, statistical significances were tested using Student's *t*-test. For DNA fiber assay and  
276 RAD51 foci evaluation, statistically significant differences were calculated using Dunn's multiple comparison  
277 test. For double-strand break repair assay, statistical significances were tested using Mann-Whitney U test.  
278 For flow cytometry analysis of hematopoietic progenitors and immune cell subtypes, the statistical  
279 significance of differences in the mean cell frequencies between treated groups and vehicle-treated control  
280 groups was determined using unpaired Student's *t*-test. Statistical significance in contingency tables were  
281 tested using Fisher's exact test. All tests were considered to be statistically significant when  $p < 0.05$ .

282



283 **SUPPLEMENTARY FIGURE LEGENDS**284 **Supplementary Figure S1. ATM-deficiency opens vulnerabilities in pancreatic ductal adenocarcinoma.**

285 **A**, Frequency of DNA repair gene alterations (n=60) in primary pancreatic ductal adenocarcinomas (PDAC)  
286 (n=751) from three pancreatic cancer sequencing data sets [17, 18, 19]. Only altered samples are  
287 represented. **B**, Localization and types of *ATM* mutations (n=27) in primary PDAC as in **A**, and **C**, contingency  
288 table comparing *ATM* mutation type and localization. **D**, Frequency of *ATM* alterations in various cancer types  
289 (n=10,945) from MSK-IMPACT clinical sequencing cohort. Only cancer types presenting *ATM* alterations are  
290 represented. *ATM* is the first mutated DNA damage response gene (from the same gene panel as in **A**) in  
291 cancer types written in red.

292

293 **Supplementary Figure S2. ATM deficiency does not sensitize cells to chemotherapies.**

294 **A, C, E, G, I, K**, Viability assay and **B, D, F, H, J, L**, colony formation assay on *Atm*<sup>+/+</sup>; *LSL-Kras*<sup>G12D/+</sup>; *Ptf1a*<sup>Cre/+</sup>  
295 (KC) and *Atm*<sup>fl/fl</sup>; *LSL-Kras*<sup>G12D/+</sup>; *Ptf1a*<sup>Cre/+</sup> (AKC) cells treated with increasing concentrations of oxaliplatin (**A**  
296 and **B**), cisplatin (**C** and **D**), paclitaxel (**E** and **F**), trametinib (**G** and **H**), AZD7762 (**I** and **J**), and CC-115 (**K** and **L**).

297

298 **Supplementary Figure S3. ATM deficiency sensitizes cells to topoisomerase inhibition.**

299 **A, C**, Viability assay and **B, D**, colony formation assay on *Atm*<sup>+/+</sup>; *LSL-Kras*<sup>G12D/+</sup>; *Ptf1a*<sup>Cre/+</sup> (KC) and *Atm*<sup>fl/fl</sup>; *LSL-*  
300 *Kras*<sup>G12D/+</sup>; *Ptf1a*<sup>Cre/+</sup> (AKC) cells treated with increasing concentrations of irinotecan (**A** and **B**) and etoposide  
301 (**C** and **D**). **E**, Schematic representation of the chorioallantoic membrane assay shown in (**F**) with treatment  
302 administration schedule. **F**, Chick chorioallantoic membrane assay performed with KC and AKC cells treated  
303 or not with irinotecan (Iri, 2 μM) and **G**, quantification of tumor surface of resected tumors. Scale bars  
304 represent 5 mm. **H**, Schematic representation of the subcutaneous assay shown in (**I**) with treatment  
305 administration schedule. **I**, Time-dependent development (over the course of 17 days) of subcutaneously  
306 engrafted tumors arising either from KC and AKC cells (respectively, black circle and red square) treated or  
307 not (respectively, dashed lines and solid lines) with irinotecan (50 mg/kg). S.c., subcutaneous. \*, *p* < 0.05; \*\*, *p*  
308 < 0.01; \*\*\*, *p* < 0.0001; a, *p* < 0.05 when compared to irinotecan-treated KC allografts.

309

310 **Supplementary Figure S4. Additional synergy interaction analyses.**

311 **A, C, E, G**, Viability assay and **B, D, F, H**, drug synergism analysis using zero interaction potency (ZIP) model  
312 on *Atm*<sup>+/+</sup>; *LSL-Kras*<sup>G12D/+</sup>; *Ptf1a*<sup>Cre/+</sup> (KC) and *Atm*<sup>fl/fl</sup>; *LSL-Kras*<sup>G12D/+</sup>; *Ptf1a*<sup>Cre/+</sup> (AKC) cells treated with varying  
313 combinations of olaparib (PARPi) and AZD7762 (CHEK1/CHEK2i) (**A** and **B**), trametinib (MEK1/2i) (**C** and **D**),  
314 irinotecan (TOP1i) (**E** and **F**) or etoposide (TOP2i) (**G** and **H**). **I, J, K**, Drug synergism analysis using ZIP model  
315 of viability assays respectively shown in Figure 1H (**I**), Figure 1K (**J**), and Figure 1N (**K**). Black squares represent  
316 an area synergy  $\delta$  score and a cell viability below 70%.

317

318 **Supplementary Figure S5. PAD cocktail induces DNA damage and chromosome aberrations.**

319 **A**, Immunofluorescence staining for H2AX p-S139 (green) and direct fluorescence staining of cortical actin by  
320 phalloidin-Atto565 (red) and **B**, quantification of H2AX p-S139 foci-positive cells in *Atm*<sup>+/+</sup>; *LSL-Kras*<sup>G12D/+</sup>;  
321 *Ptf1a*<sup>Cre/+</sup> (KC) and *Atm*<sup>fl/fl</sup>; *LSL-Kras*<sup>G12D/+</sup>; *Ptf1a*<sup>Cre/+</sup> (AKC) cells treated or not with olaparib (PARPi, 1  $\mu$ M), VE-  
322 822 (ATRI, 20 nM) and CC-115 (DNA-PKi, 30 nM) in combination for 48 h (PAD, PARPi/ATRI/DNA-PKi). Cells  
323 were counterstained with DAPI (blue). Scale bars represent 10  $\mu$ m. **C**, Direct fluorescence staining of DNA by  
324 DAPI (white) and **D**, quantification of chromosome aberrations and **E**, chromatid fusions in metaphase  
325 spreads of KC and AKC cells treated or not with olaparib, VE-822 and CC-115 as single agents or in  
326 combination for 48 h (as in **A**). White arrows show chromosome aberrations (**C**). Scale bars represent 10  $\mu$ m  
327 in left panels and 3  $\mu$ m in vertical right panels. **F**, Direct fluorescence staining of DNA by DAPI (white) and **G**,  
328 quantification of micronuclei in KC and AKC cells treated or not with olaparib, VE-822 and CC-115 as single  
329 agents or in combination for 48 h (as in **A**). White arrows show micronuclei (**F**). Scale bars represent 10  $\mu$ m.  
330 **D**, chromatid dicentric fusion; **Fr**, chromatid fragment; **G**, chromatid gap; **M**, chromatid monocentric fusion.  
331 \*,  $p < 0.05$ ; \*\*,  $p < 0.01$ ; \*\*\*,  $p < 0.001$ .

332

333 **Supplementary Figure S6. Genetic or chemical targeting of ATM sensitizes human PDAC cells to DNA**  
334 **damaging drugs.**

335 **A**, Schematic representation of CRISPR/Cas9 strategy to generate *ATM*<sup>+/ $\Delta$</sup>  and *ATM* <sup>$\Delta$ / $\Delta$</sup>  human PDAC cells. **B**,  
336 Qualitative PCR analysis of CRISPRed MIA PaCa-2 clones. **C**, DNA sequence of wild-type *ATM* and CRISPRed  
337 *ATM*<sup>+/ $\Delta$</sup>  MIA PaCa-2 clones at *ATM* exons 3-4. **D**, qRT-PCR analysis of *ATM* expression in *ATM*<sup>+/+</sup>, *ATM*<sup>+/ $\Delta$</sup>  and,  
338 *ATM* <sup>$\Delta$ / $\Delta$</sup>  MIA PaCa-2 cells. **E**, Viability assay analysis of olaparib treatment in CRISPRed *ATM*<sup>+/+</sup> and *ATM*<sup>+/ $\Delta$</sup>   
339 PANC-1 cells. **F**, **G**, Drug synergism analysis using ZIP model of viability assays respectively shown in Figure 5C  
340 (**F**) and Figure 5J (**G**). Black squares represent an area synergy  $\delta$  score and a cell viability below 70%. **H**,  
341 Viability assay on CRISPRed *ATM*<sup>+/+</sup> and *ATM*<sup>+/ $\Delta$</sup>  PANC-1 cells treated with varying combinations of VE-822  
342 (ATRI) and CC-115 (DNA-PKi) and a fixed dose of olaparib (PARPi) plus an ATM inhibitor (AZD0156). Veh,  
343 vehicle. \*\*\*,  $p < 0.001$ ; \*\*\*\*,  $p < 0.0001$ .

344

345 **Supplementary Figure S7. ATM inhibition sensitizes PDAC patient-derived organoids to PAD therapy.**

346 **A**, Schematic representation of cytotoxicity assay shown in (**C**). **B**, Representative images of patient-derived  
347 organoids (PDOs) isolated from patient-derived xenografts. Scale bars represent 400  $\mu$ m. **C**, Cytotoxicity assay  
348 on PDOs treated or not with an ATM inhibitor (AZD0156, 2  $\mu$ M) and with olaparib (PARPi, 25  $\mu$ M), VE-822  
349 (ATRI, 20 nM) and CC-115 (DNA-PKi, 30 nM) in combination for 96 h (PAD, PARPi/ATRI/DNA-PKi).

350

351 **Supplementary Figure S8. ATM inhibition sensitizes PDAC patient-derived xenografts to PAD therapy.**

352 Time-dependent development (over the course of 17 days (Gö14, Bo62, Bo61, Bo59), 16 days (Panc185 and  
353 Panc420), or 12 days (Gö8 and Gö9)) of subcutaneously engrafted tumors arising from ten PDXs treated or

354 not (respectively, dashed lines and solid lines) with a combination of AZD0156 and PAD as in Figure 7D and  
355 7H, with representative macroscopic images. Scale bars represent 5 mm.

356

357 **Supplementary Figure S9. PAD plus ATM inhibitor therapy results in tolerable adverse effects in**  
358 **immunocompetent C57BL/6J mice.**

359 **A**, Graphic representation showing results of flow cytometry analyses of common lymphoid progenitor (CLP),  
360 common myeloid progenitor (CMP), megakaryocyte/erythrocyte progenitor (MEP), and  
361 granulocyte/macrophage progenitor (GMP) populations in peripheral blood of C57BL/6J mice enrolled in the  
362 toxicity assay and treated with AZD0156 (2.25 mg/kg) and PAD (olaparib (50 mg/kg), VE-822 (20 mg/kg) and,  
363 CC-115 (2.5 mg/kg)) as shown in Figure 7L. **B**, Graphic representation showing results of flow cytometry  
364 analyses of natural killer (NK) cell, B cell, CD3+ T cell, macrophage, neutrophil, myeloid dendritic cell (mDC),  
365 and plasmacytoid dendritic cell (pDC) populations in bone marrow and in peripheral blood of C57BL/6J mice  
366 enrolled in the toxicity assay and treated with AZD0156 and PAD as in (A). **C, D**, Immunohistochemistry  
367 staining for H2AX p-S139 and cleaved caspase-3 (CC3) in resected gut (C) and liver (D) from toxicity assay  
368 shown in Figure 7L. Scale bars represent 150  $\mu\text{m}$ . BM, bone marrow; Veh, vehicle. \*,  $p < 0.05$ ; \*\*,  $p < 0.01$ ;  
369 \*\*\*,  $p < 0.001$ .

370

371 **Supplementary Figure S10. Resistance to PARP inhibition in ATM-deficient PDAC cells involves drug efflux**  
372 **and induces an epithelial-mesenchymal transition.**

373 **A**, Volcano plot displaying differential expressed genes between PARP inhibition-resistant  $Atm^{fl/fl}; LSL-$   
374  $Kras^{G12D/+}; Ptf1a^{Cre/+}$  (R-AKC) and  $Atm^{fl/fl}; LSL-Kras^{G12D/+}; Ptf1a^{Cre/+}$  (AKC) cells. Red dots represent the  
375 upregulated expressed transcripts and blue dots represent the downregulated expressed transcripts. **B**,  
376 DAVID-based and **C**, Molecular Signature Database-based gene ontology biological process term enrichment  
377 analyses in R-AKC vs. AKC cells. **D**, qRT-PCR analysis of drug efflux transporters gene expression in AKC and R-  
378 AKC cells. **E**, Gene set enrichment analysis in R-AKC vs. AKC cells. NES, normalized enrichment score; Nom.  $p$ -  
379 value, nominal  $p$ -value; FDR, false discovery rate. \*\*\*\*,  $p < 0.0001$ .

380

381 **Supplementary Figure S11. Clonal evolution during acquisition of PARP inhibition resistance in ATM-**  
382 **deficient PDAC cells.**

383 Whole exome sequencing-based clonogenicity analysis of  $Atm^{fl/fl}; LSL-Kras^{G12D/+}; Ptf1a^{Cre/+}$  (AKC) and PARP  
384 inhibition-resistant  $Atm^{fl/fl}; LSL-Kras^{G12D/+}; Ptf1a^{Cre/+}$  (R-AKC) cell lines.

385

386 **Supplementary Figure S12. Resistance to PARP inhibition in ATM-deficient cells involves alternative DNA**  
387 **damage repair pathway.**

388 **A**, qRT-PCR analysis of *Fancd2*, *Mgmt*, and *Paxip1* gene expression in  $Atm^{fl/fl}; LSL-Kras^{G12D/+}; Ptf1a^{Cre/+}$  (AKC)  
389 and PARP inhibition-resistant  $Atm^{fl/fl}; LSL-Kras^{G12D/+}; Ptf1a^{Cre/+}$  (R-AKC) cells. **B**, Viability assay on AKC and R-

390 AKC cells treated or not with increasing doses of gamma radiation. **C**, qRT-PCR analysis of *Lig1* gene  
391 expression in *shScramble*- (shScr) and *shLig1*-harboring R-AKC cells. LD<sub>50</sub>, lethal dose 50%. \*\*\*,  $p < 0.001$ ;  
392 \*\*\*\*,  $p < 0.0001$ .

393

#### 394 **SUPPLEMENTARY FIGURES**

395 **Supplementary Figure S1.** ATM-deficiency opens vulnerabilities in pancreatic ductal adenocarcinoma.

396 **Supplementary Figure S2.** ATM deficiency does not sensitize cells to chemotherapies.

397 **Supplementary Figure S3.** ATM deficiency sensitizes cells to topoisomerase inhibition.

398 **Supplementary Figure S4.** Additional synergy interaction analyses.

399 **Supplementary Figure S5.** PAD cocktail induces DNA damage and chromosome aberrations.

400 **Supplementary Figure S6.** Genetic or chemical targeting of ATM sensitizes human PDAC cells to DNA  
401 damaging drugs.

402 **Supplementary Figure S7.** ATM inhibition sensitizes PDAC patient-derived organoids to PAD therapy.

403 **Supplementary Figure S8.** ATM inhibition sensitizes PDAC patient-derived xenografts to PAD therapy.

404 **Supplementary Figure S9.** PAD plus ATM inhibitor therapy results in tolerable adverse effects in  
405 immunocompetent C57BL/6J mice.

406 **Supplementary Figure S10.** Resistance to PARP inhibition in ATM-deficient PDAC cells involves drug efflux  
407 and induces an epithelial-mesenchymal transition.

408 **Supplementary Figure S11.** Clonal evolution during acquisition of PARP inhibition resistance in ATM-deficient  
409 PDAC cells.

410 **Supplementary Figure S12.** Resistance to PARP inhibition in ATM-deficient cells involves alternative DNA  
411 damage repair pathway.

412 **SUPPLEMENTARY TABLES**

413 **Supplementary Table 1.** Germline mutation frequency of DNA damage response genes in human primary  
414 pancreatic adenocarcinoma (PDAC). For that, we screened and analyzed germline mutations data from three  
415 unselected PDAC cohorts [25, 26, 27] (1,441 tumor samples).

416 **Supplementary Table 2.** qPCR oligonucleotide sequences used in this study.

417 **Supplementary Table 3.** Primary and secondary antibodies used in this study.

418 **Supplementary Table 4.** Antibody combinations used in this study for the detection of hematopoietic  
419 progenitors and immune cell subtypes by flow cytometry.

420 **Supplementary Table 5.** Antibodies used in this study for the detection of hematopoietic progenitors and  
421 immune cell subtypes by flow cytometry.

422 **SUPPLEMENTARY REFERENCES**

- 423 1 Bernstein JL, Teraoka S, Haile RW, Børresen-Dale AL, Rosenstein BS, Gatti RA, *et al.* Designing and implementing  
424 quality control for multi-center screening of mutations in the ATM gene among women with breast cancer. *Human*  
425 *mutation* 2003;**21**:542-50.
- 426 2 Jackson EL, Willis N, Mercer K, Bronson RT, Crowley D, Montoya R, *et al.* Analysis of lung tumor initiation and  
427 progression using conditional expression of oncogenic K-ras. *Genes & development* 2001;**15**:3243-8.
- 428 3 Kawaguchi Y, Cooper B, Gannon M, Ray M, MacDonald RJ, Wright CV. The role of the transcriptional regulator  
429 Ptf1a in converting intestinal to pancreatic progenitors. *Nature genetics* 2002;**32**:128.
- 430 4 Marino S, Vooijs M, van Der Gulden H, Jonkers J, Berns A. Induction of medulloblastomas in p53-null mutant  
431 mice by somatic inactivation of Rb in the external granular layer cells of the cerebellum. *Genes & development*  
432 2000;**14**:994-1004.
- 433 5 Perkhofer L, Schmitt A, Carrasco MCR, Ihle M, Hampp S, Ruess DA, *et al.* ATM deficiency generating genomic  
434 instability sensitizes pancreatic ductal adenocarcinoma cells to therapy-induced DNA damage. *Cancer research*  
435 2017;**77**:5576-90.
- 436 6 Perkhofer L, Engler M, Gout J, Arnold F, Morawe M, Breunig M, *et al.* Pancreatic Ductal Organoids React Kras  
437 Dependent to the Removal of Tumor Suppressive Roadblocks. *Stem cells international* 2019;**2019**.
- 438 7 Tiriach H, Belleau P, Engle DD, Plenker D, Deschênes A, Somerville TD, *et al.* Organoid profiling identifies common  
439 responders to chemotherapy in pancreatic cancer. *Cancer discovery* 2018;**8**:1112-29.
- 440 8 Pommier RM, Gout J, Vincent DF, Cano CE, Kaniewski B, Martel S, *et al.* The human NUPR1/P8 gene is  
441 transcriptionally activated by transforming growth factor  $\beta$  via the SMAD signalling pathway. *Biochemical Journal*  
442 2012;**445**:285-93.
- 443 9 Bohringer M, Obermeier K, Griner N, Waldruff D, Dickinson E, Eirich K, *et al.* siRNA screening identifies  
444 differences in the Fanconi anemia pathway in BALB/c-Trp53<sup>+/-</sup> with susceptibility versus C57BL/6-Trp53<sup>+/-</sup> mice with  
445 resistance to mammary tumors. *Oncogene* 2013;**32**:5458-70.
- 446 10 Akyuz N, Boehden GS, Susse S, Rimek A, Preuss U, Scheidtmann KH, *et al.* DNA substrate dependence of p53-  
447 mediated regulation of double-strand break repair. *Molecular and cellular biology* 2002;**22**:6306-17.
- 448 11 Bennardo N, Gunn A, Cheng A, Hasty P, Stark JM. Limiting the persistence of a chromosome break diminishes  
449 its mutagenic potential. *PLoS Genet* 2009;**5**:e1000683.
- 450 12 Grigaravicius P, Kaminska E, Hübner C, McKinnon P, Von Deimling A, Frappart P. Rint1 inactivation triggers  
451 genomic instability, ER stress and autophagy inhibition in the brain. *Cell death and differentiation* 2016;**23**:454.
- 452 13 Dignam JD, Lebovitz RM, Roeder RG. Accurate transcription initiation by RNA polymerase II in a soluble extract  
453 from isolated mammalian nuclei. *Nucleic acids research* 1983;**11**:1475-89.
- 454 14 Syrovets T, Gschwend JE, Buchele B, Laumonier Y, Zugmaier W, Genze F, *et al.* Inhibition of I $\kappa$ B kinase  
455 activity by acetyl-boswellic acids promotes apoptosis in androgen-independent PC-3 prostate cancer cells in vitro and  
456 in vivo. *The Journal of biological chemistry* 2005;**280**:6170-80.
- 457 15 Cerami E, Gao J, Dogrusoz U, Gross BE, Sumer SO, Aksoy BA, *et al.* The cBio cancer genomics portal: an open  
458 platform for exploring multidimensional cancer genomics data. *AAACR*, 2012.
- 459 16 Gao J, Aksoy BA, Dogrusoz U, Dresdner G, Gross B, Sumer SO, *et al.* Integrative analysis of complex cancer  
460 genomics and clinical profiles using the cBioPortal. *Sci Signal* 2013;**6**:pl1-pl.
- 461 17 Bailey P, Chang DK, Nones K, Johns AL, Patch AM, Gingras MC, *et al.* Genomic analyses identify molecular  
462 subtypes of pancreatic cancer. *Nature* 2016;**531**:47-52.
- 463 18 Hoadley KA, Yau C, Hinoue T, Wolf DM, Lazar AJ, Drill E, *et al.* Cell-of-Origin Patterns Dominate the Molecular  
464 Classification of 10,000 Tumors from 33 Types of Cancer. *Cell* 2018;**173**:291-304 e6.
- 465 19 Witkiewicz AK, McMillan EA, Balaji U, Baek G, Lin WC, Mansour J, *et al.* Whole-exome sequencing of pancreatic  
466 cancer defines genetic diversity and therapeutic targets. *Nature communications* 2015;**6**:6744.
- 467 20 Parekh S, Ziegenhain C, Vieth B, Enard W, Hellmann I. The impact of amplification on differential expression  
468 analyses by RNA-seq. *Scientific reports* 2016;**6**:25533.
- 469 21 Macosko EZ, Basu A, Satija R, Nemesh J, Shekhar K, Goldman M, *et al.* Highly Parallel Genome-wide Expression  
470 Profiling of Individual Cells Using Nanoliter Droplets. *Cell* 2015;**161**:1202-14.
- 471 22 Love MI, Huber W, Anders S. Moderated estimation of fold change and dispersion for RNA-seq data with  
472 DESeq2. *Genome biology* 2014;**15**:550.
- 473 23 Huang DW, Sherman BT, Lempicki RA. Systematic and integrative analysis of large gene lists using DAVID  
474 bioinformatics resources. *Nature protocols* 2009;**4**:44.
- 475 24 Huang DW, Sherman BT, Lempicki RA. Bioinformatics enrichment tools: paths toward the comprehensive  
476 functional analysis of large gene lists. *Nucleic acids research* 2008;**37**:1-13.
- 477 25 Shindo K, Yu J, Suenaga M, Fesharakizadeh S, Cho C, Macgregor-Das A, *et al.* Deleterious Germline Mutations  
478 in Patients With Apparently Sporadic Pancreatic Adenocarcinoma. *J Clin Oncol* 2017;**35**:3382-90.

- 479 26 Brand R, Borazanci E, Speare V, Dudley B, Karloski E, Peters MLB, *et al.* Prospective study of germline genetic  
480 testing in incident cases of pancreatic adenocarcinoma. *Cancer* 2018;**124**:3520-7.
- 481 27 Yurgelun MB, Chittenden AB, Morales-Oyarvide V, Rubinson DA, Dunne RF, Kozak MM, *et al.* Germline cancer  
482 susceptibility gene variants, somatic second hits, and survival outcomes in patients with resected pancreatic cancer.  
483 *Genet Med* 2019;**21**:213-23.
- 484
