# Supplementary material for: Synergistic targeting and resistance to PARP inhibition in DNA damage repair-deficient pancreatic cancer
Source: PubMed Central journal article supplement — Gut. 2020 Sep 1;70(4):743–60. doi: 10.1136/gutjnl-2019-319970 (PMC7948173; doi:10.1136/gutjnl-2019-319970), 2020-09-01
Supplement: gutjnl-2019-319970supp002.pdf [file gutjnl-2019-319970supp002.pdf]

Supplementary. Fig. S1

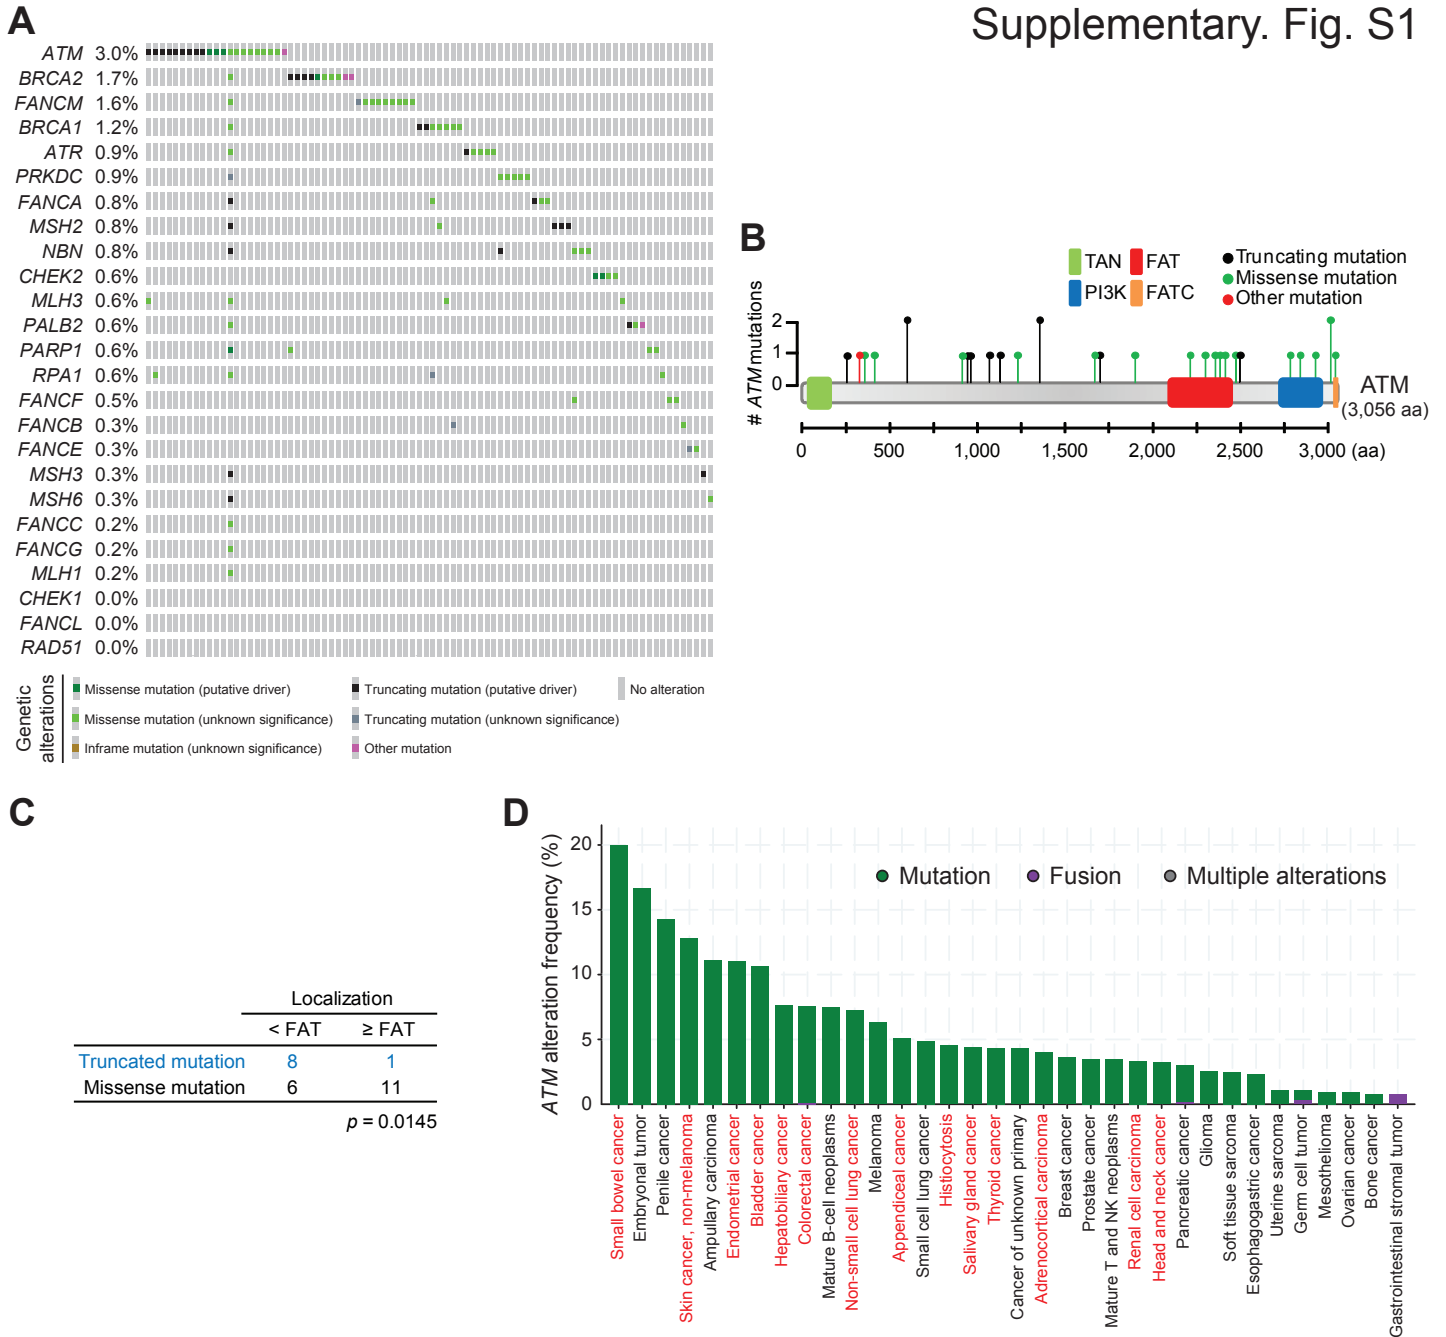

## Supplementary Fig. S2

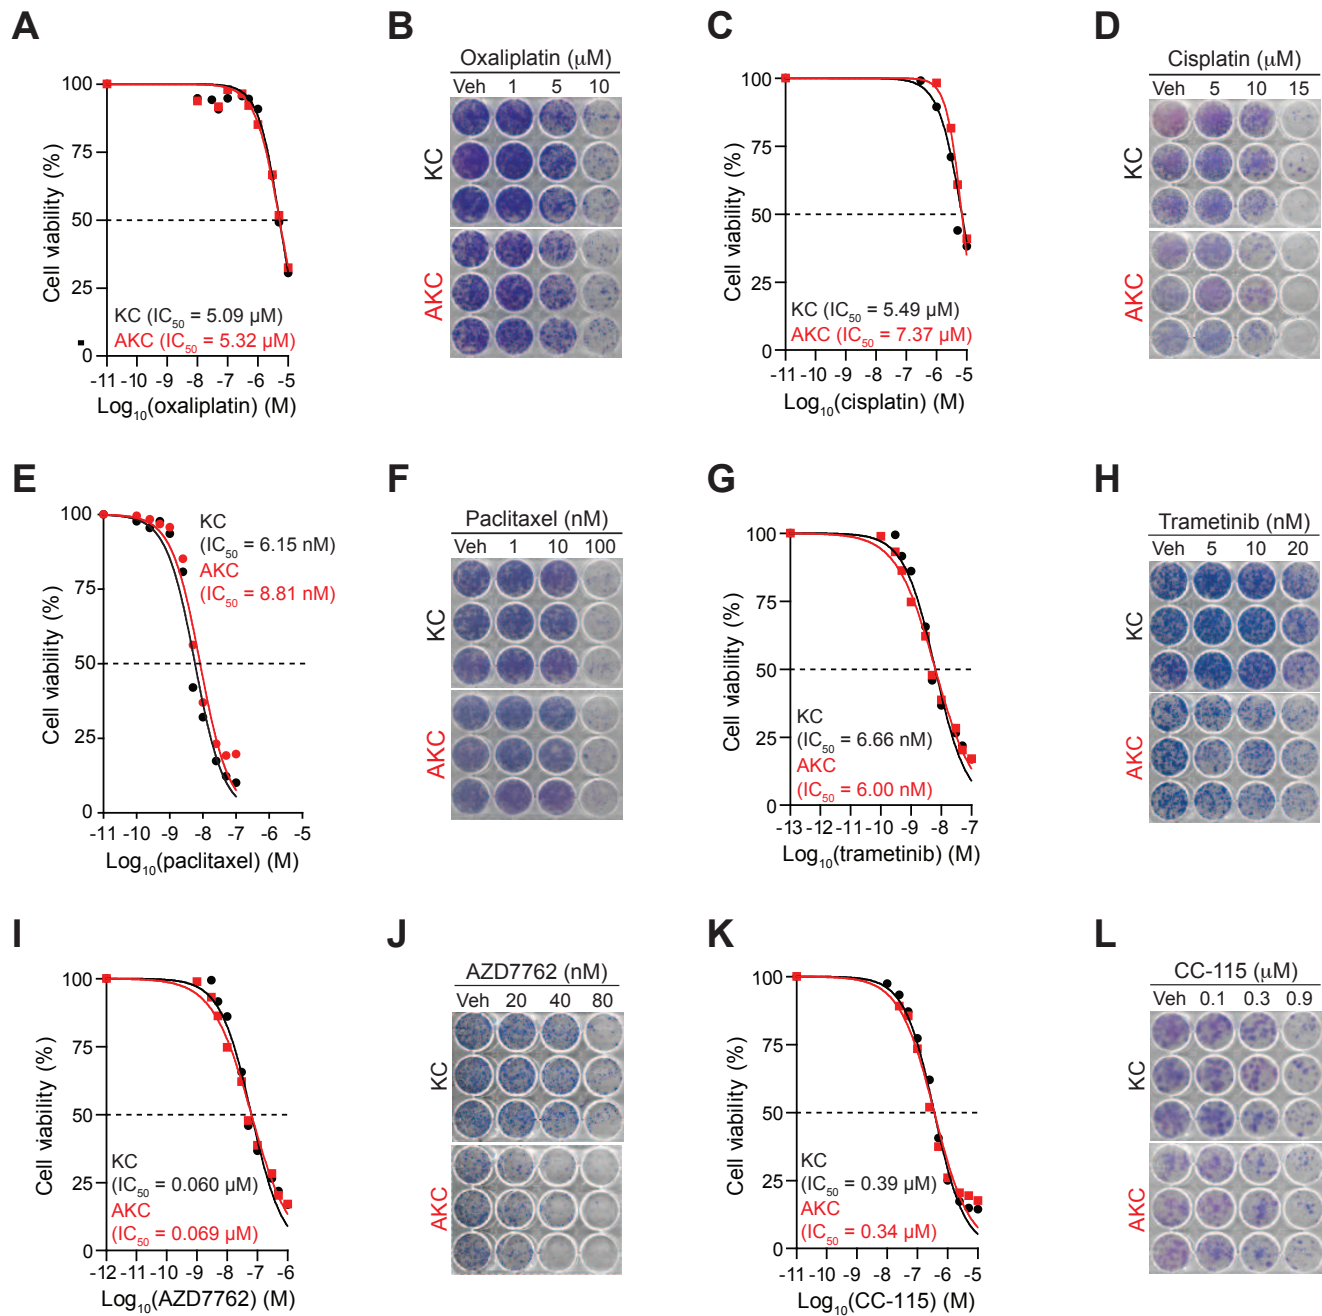

## Supplementary Fig. S3

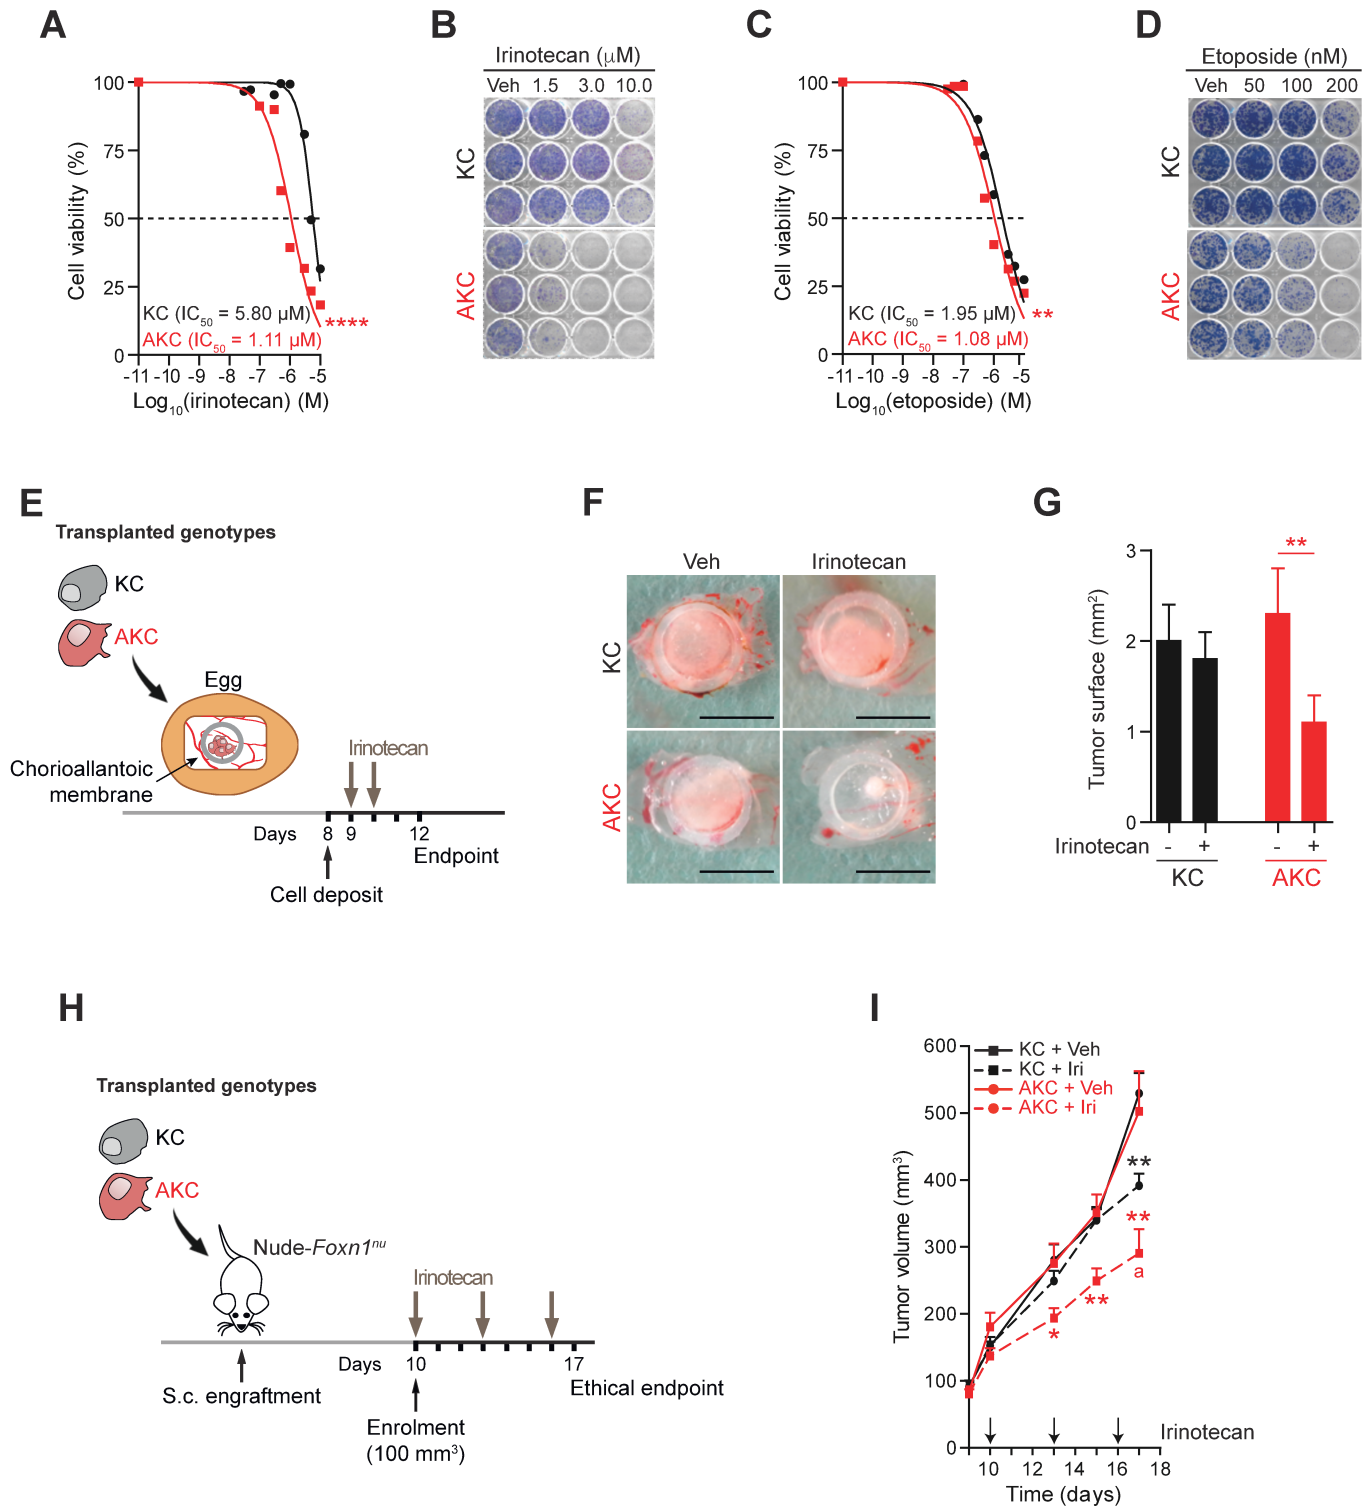

## Supplementary Fig. S4

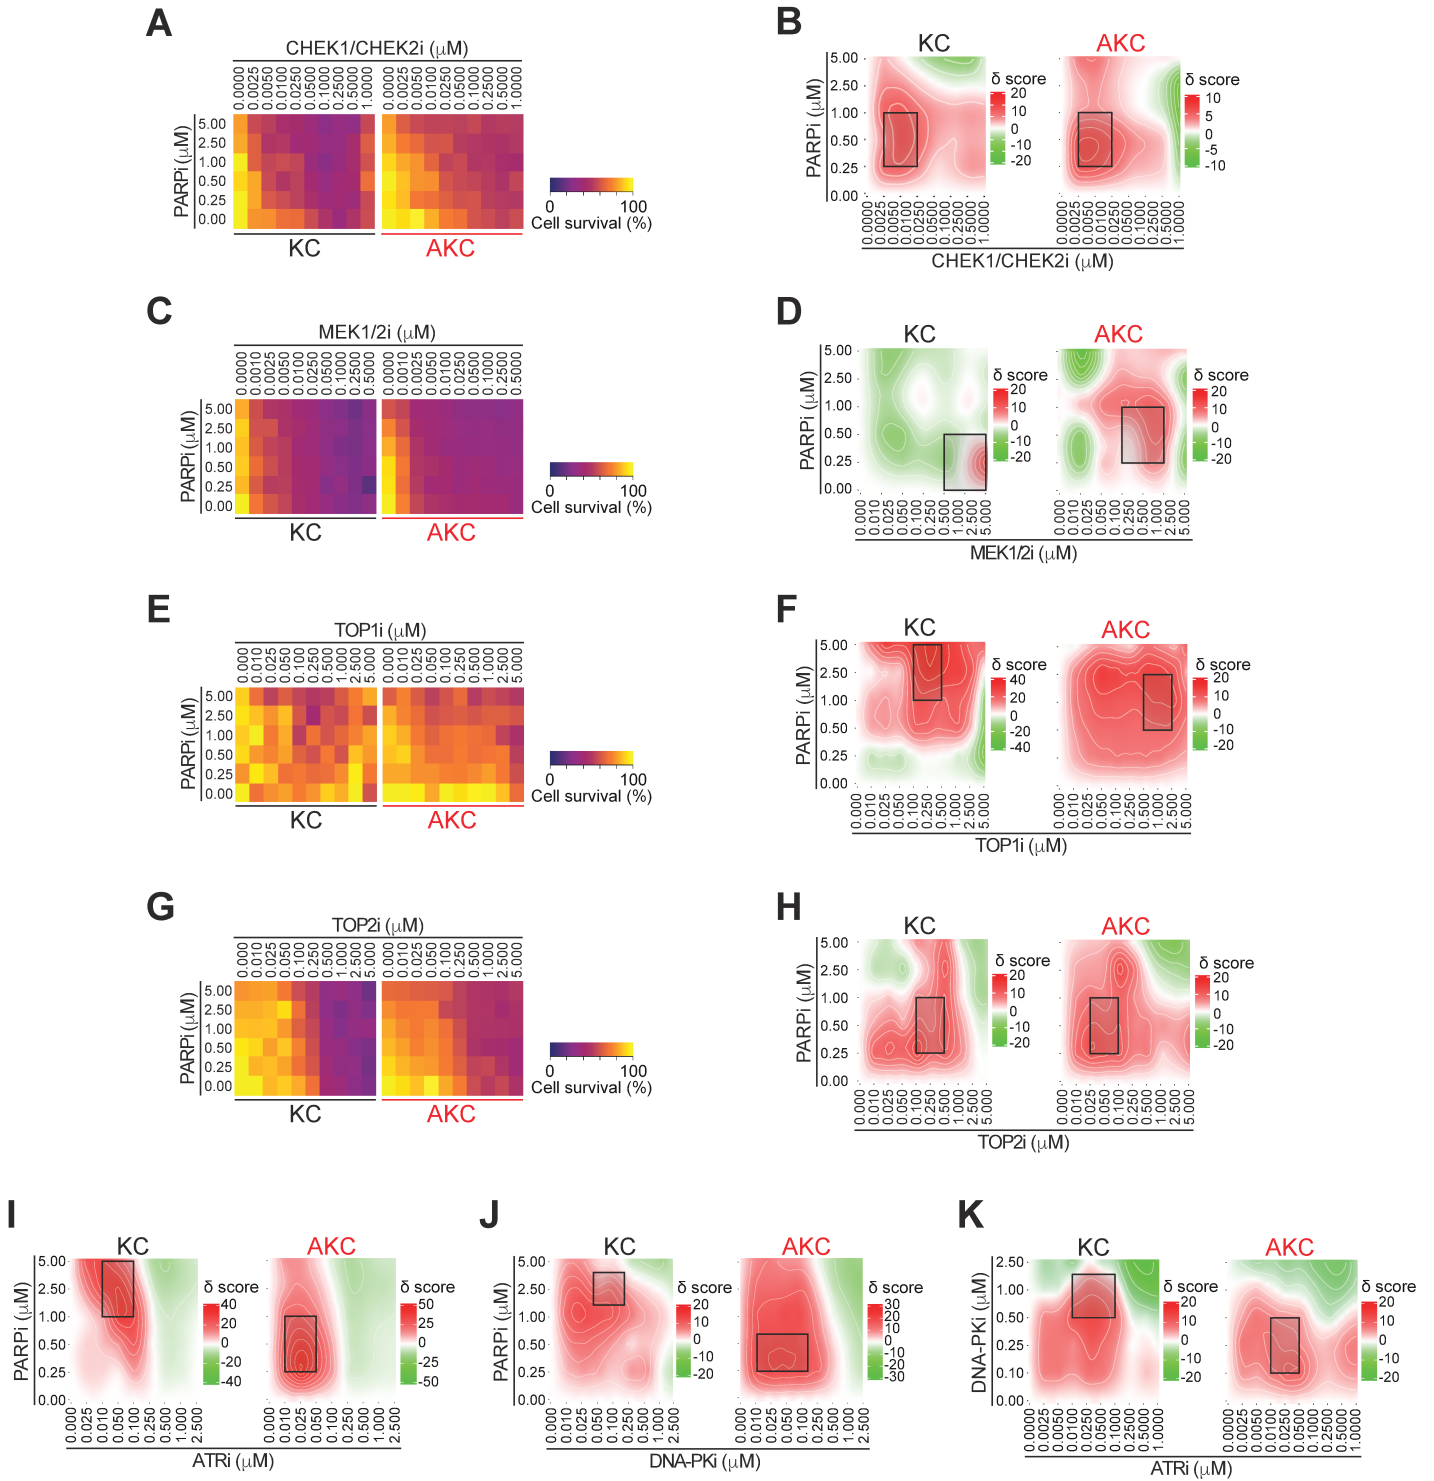





## Supplementary Fig. S6

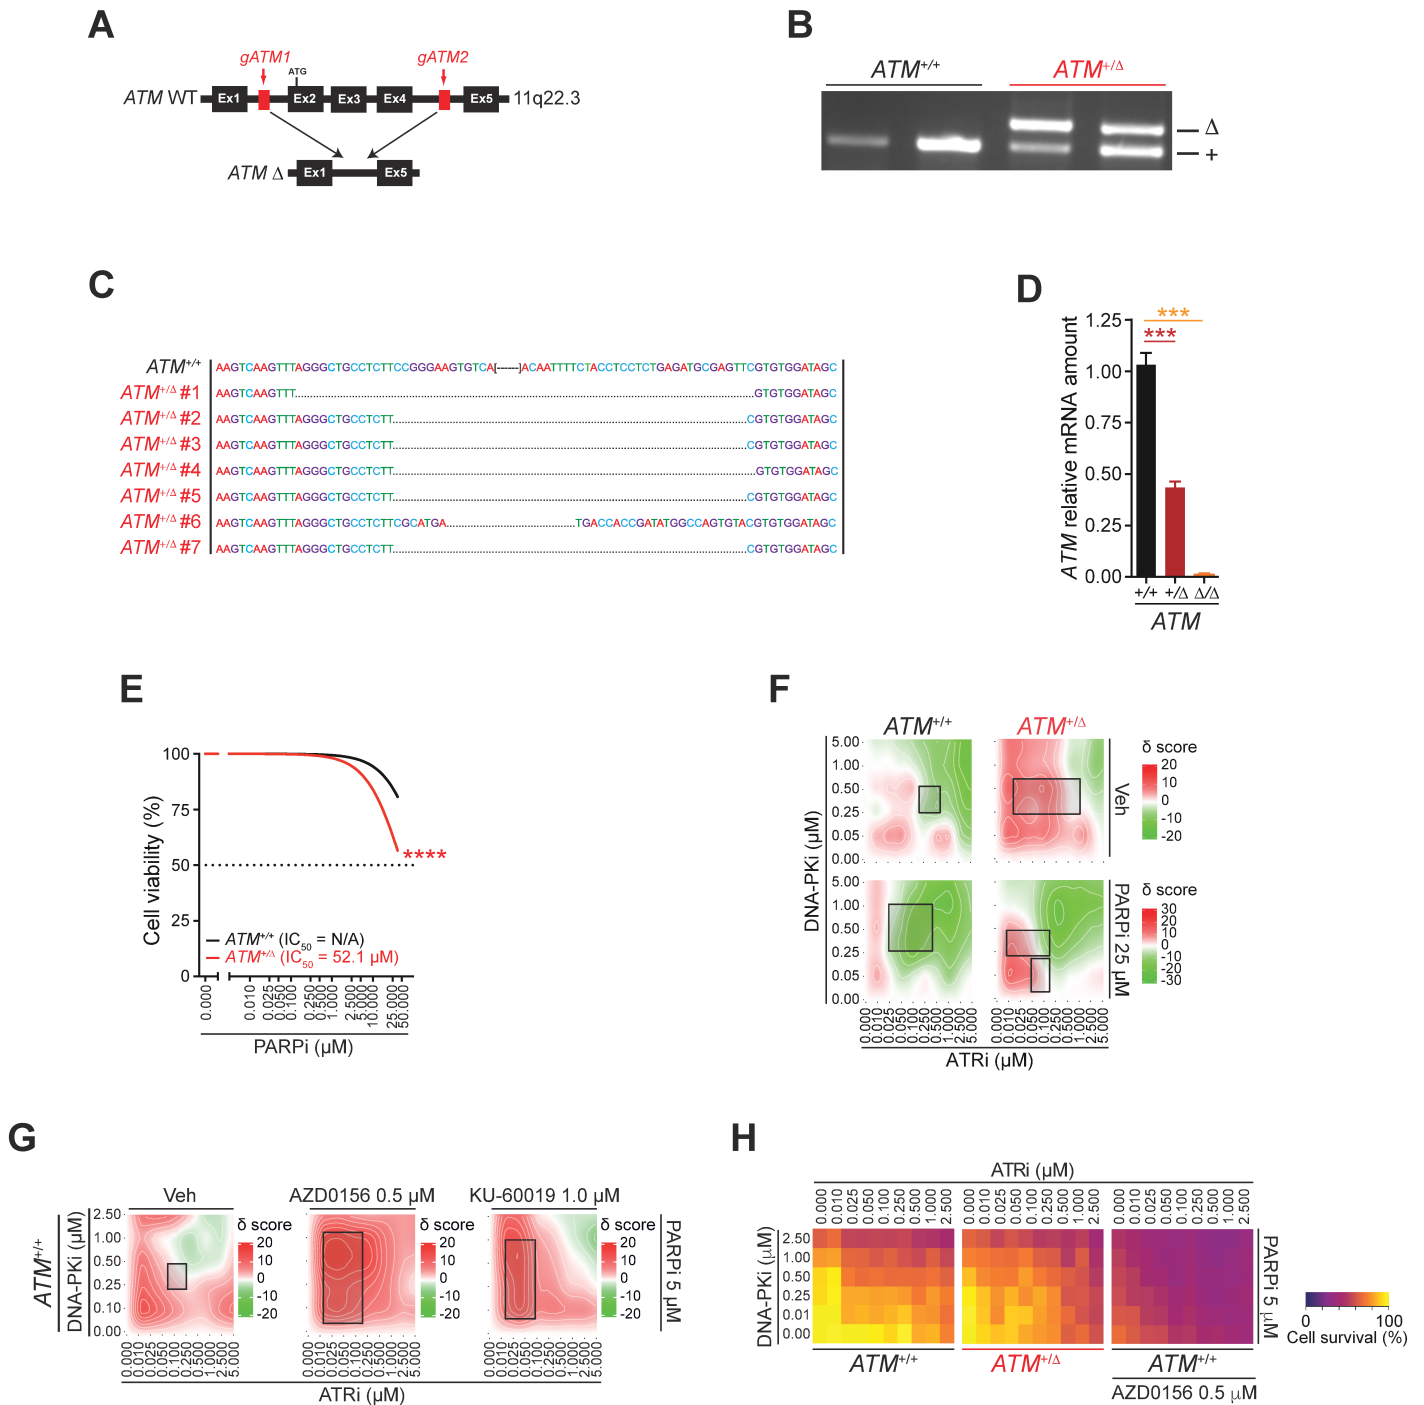

Supplementary Fig. S7

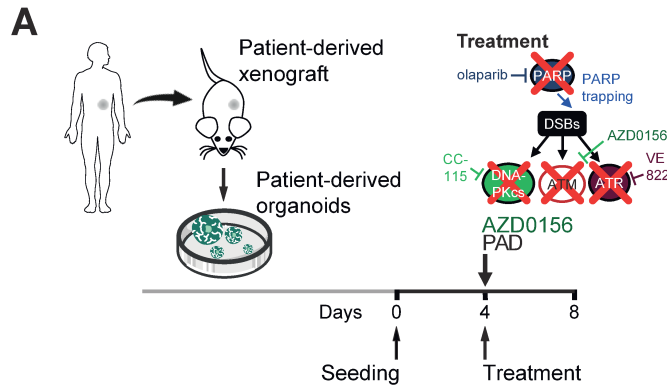

**B**

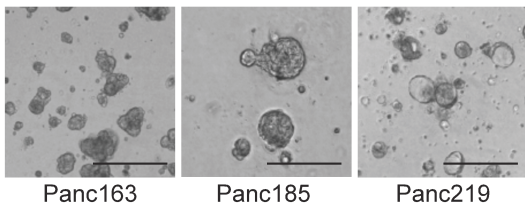

**C**

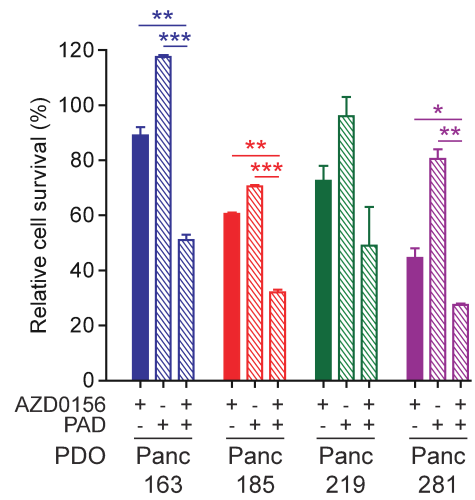

### Supplementary Fig. S8

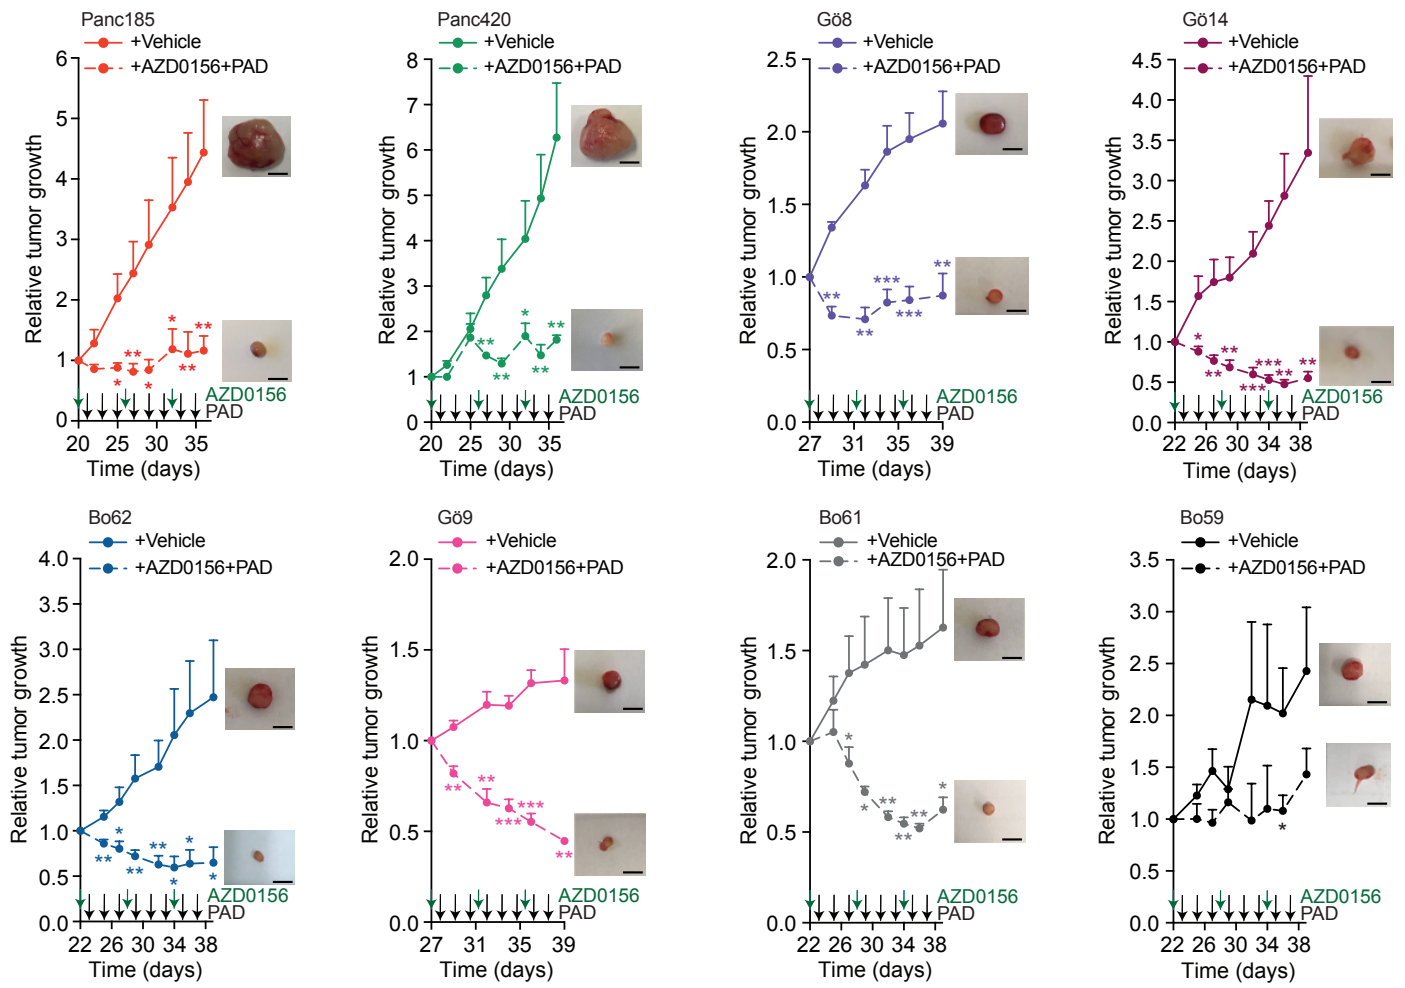

## Supplementary Fig. S9

**A**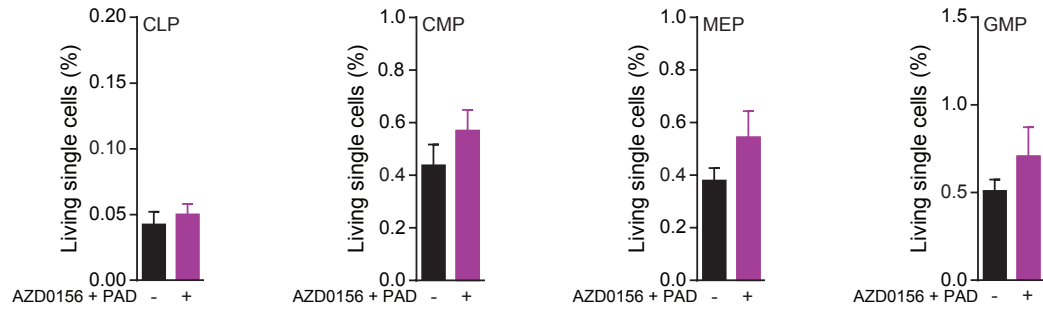**B**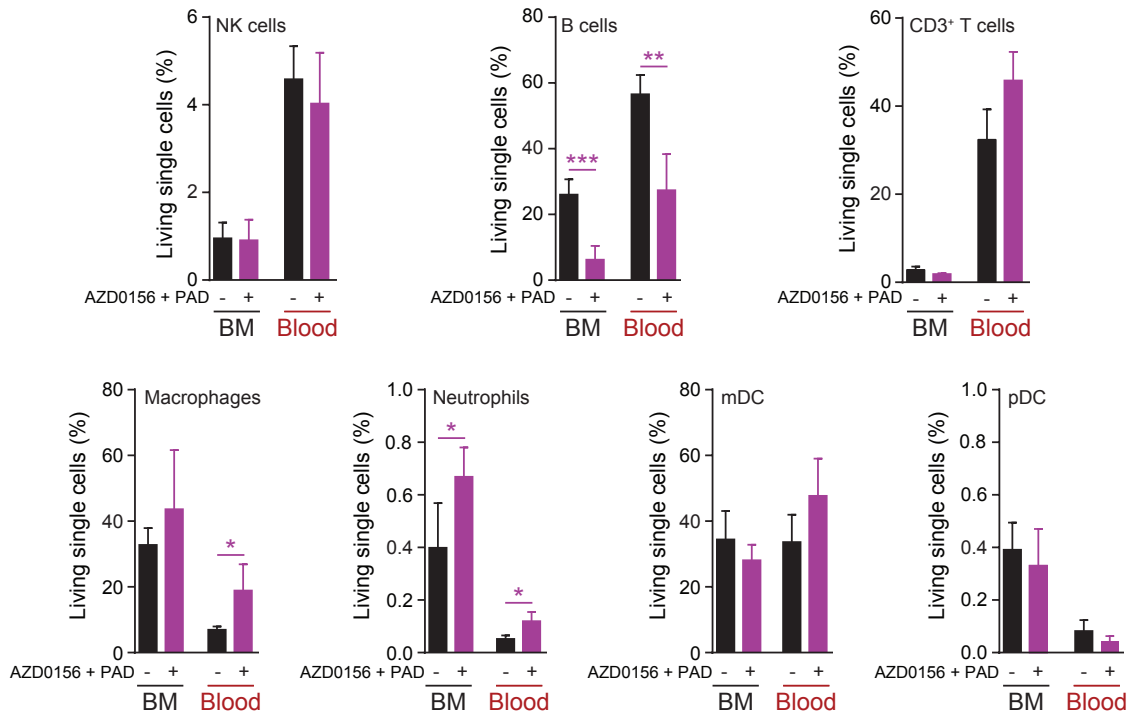**C**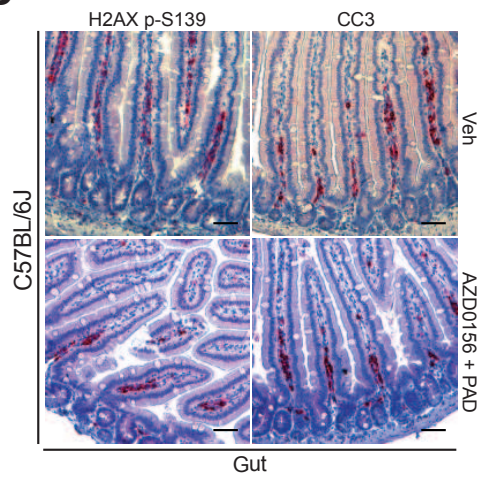**D**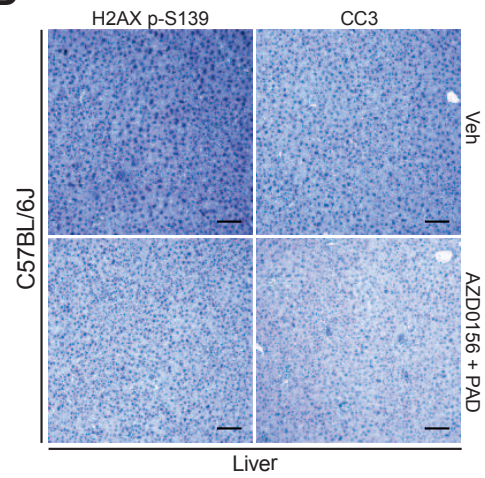

### Supplementary Fig. S10

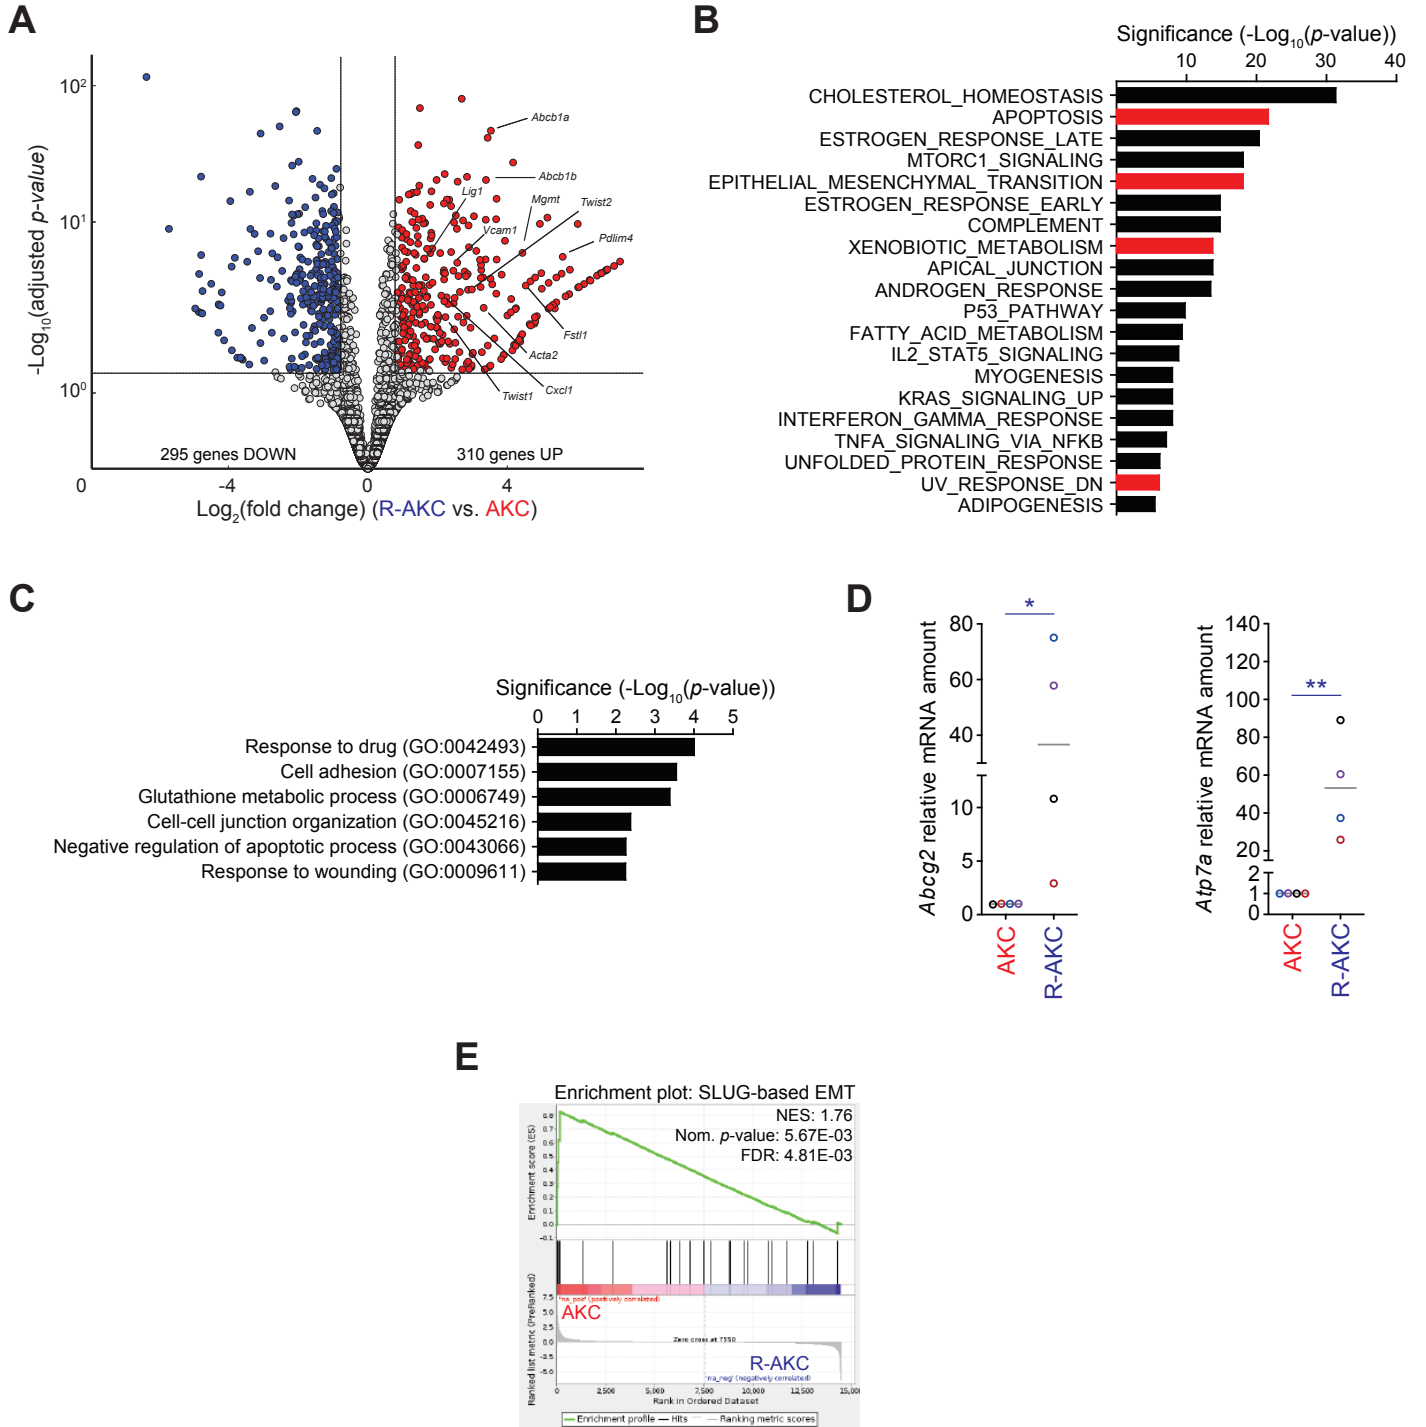



# Supplementary Fig. S11

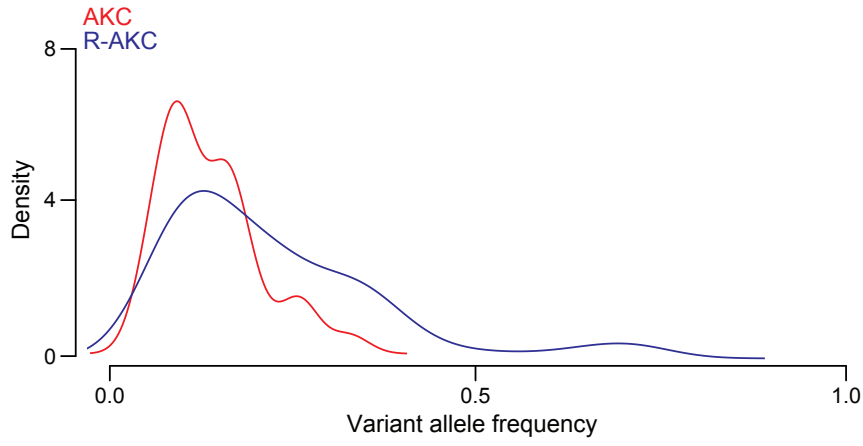



## Supplementary Table 1

|              | Shindo et al,<br>2017 | Brand et al,<br>2018 | Yurgelun et<br>al, 2019 | Total<br>mutations | Mutation<br>prevalence (%) |
|--------------|-----------------------|----------------------|-------------------------|--------------------|----------------------------|
| <i>ATM</i>   | 10                    | 10                   | 4                       | 24                 | 1.67                       |
| <i>BRCA2</i> | 12                    | 4                    | 4                       | 20                 | 1.39                       |
| <i>BRCA1</i> | 3                     | 4                    | 3                       | 10                 | 0.69                       |
| <i>PALB2</i> | 2                     | 1                    | 1                       | 4                  | 0.28                       |
| <i>MLH1</i>  | 2                     | 0                    | 0                       | 2                  | 0.14                       |
| <i>MSH2</i>  | 0                     | 0                    | 1                       | 1                  | 0.07                       |
| <i>STK11</i> | 0                     | 0                    | 0                       | 0                  | 0.00                       |
| <i>RPA1</i>  | N/A                   | N/A                  | N/A                     | N/A                | N/A                        |

## Supplementary Table 2

| <b>Name</b>      | <b>Company</b>                                                                          |
|------------------|-----------------------------------------------------------------------------------------|
| <i>18S</i>       | Fw: 5'-GTAACCCGTTGAACCCATT-3', Biomers<br>Rev: 5'-CCATCCAATCGGTAGTAGCG-3', Biomers      |
| <i>Abcb1a</i>    | KiCqStart SYBR Green Primers, Sigma-Aldrich                                             |
| <i>Abcc1</i>     | KiCqStart SYBR Green Primers, Sigma-Aldrich                                             |
| <i>Abcc2</i>     | KiCqStart SYBR Green Primers, Sigma-Aldrich                                             |
| <i>Abcg2</i>     | KiCqStart SYBR Green Primers, Sigma-Aldrich                                             |
| <i>Atp7a</i>     | KiCqStart SYBR Green Primers, Sigma-Aldrich                                             |
| <i>ATM</i>       | KiCqStart SYBR Green Primers, Sigma-Aldrich                                             |
| <i>Bak1</i>      | Fw: 5'-AAGGTGGGCTGCGATGAGTCC-3', Biomers<br>Rev: 5'-GGGTCTCCTGTTCCCTGCTGGTG-3', Biomers |
| <i>Bax</i>       | Fw: 5'-TAGCAAAGTGGTGCTCAAGG-3', Biomers<br>Rev: 5'-TCTTGATCCAGACAAGCAG-3', Biomers      |
| <i>Cdh2</i>      | Fw: 5'-CATCAACCGGCTTAATGGTG-3', Biomers<br>Rev: 5'-ACTTTCACACGCAGGATGGA-3', Biomers     |
| <i>Gstm1</i>     | KiCqStart SYBR Green Primers, Sigma-Aldrich                                             |
| <i>Gstp1</i>     | KiCqStart SYBR Green Primers, Sigma-Aldrich                                             |
| <i>Gstt1</i>     | KiCqStart SYBR Green Primers, Sigma-Aldrich                                             |
| <i>HPRT</i>      | Hs_HPRT1_1_SG QuantiTect Primer Assay, Qiagen                                           |
| <i>Lig1</i>      | KiCqStart SYBR Green Primers, Sigma-Aldrich                                             |
| <i>Mdm2</i>      | KiCqStart SYBR Green Primers, Sigma-Aldrich                                             |
| <i>Noxa</i>      | Fw: 5'-GAGTGCACCGGACATAACTG-3', Biomers<br>Rev: 5'-CTCGTCCTCAAGTCTGCTG-3', Biomers      |
| <i>P21Cip1</i>   | Fw: 5'-GTAATTCCTCTGCCCTGCTG-3', Biomers<br>Rev: 5'-TTTCGGCCCTGAGATGTTCC-3', Biomers     |
| <i>Snai1</i>     | Fw: 5'-TGGTATCTTTCACATCCGAG-3', Biomers<br>Rev: 5'-GTGAGAAGCCATTCTCCTGC-3', Biomers     |
| <i>Tgfb1</i>     | mM_Tgfb_1_SG QuantiTect Primer Assay, Qiagen                                            |
| <i>Trp53inp1</i> | Fw: 5'-TCCTCAGCAGAGCACACTTC-3', Biomers<br>Rev: 5'-TCCATTGGACAGGACTCAAA-3', Biomers     |

### Supplementary Table 3

| Name                                 | Antibody specification         | Dilution | Company                   |
|--------------------------------------|--------------------------------|----------|---------------------------|
| ACTB (C4)                            | Mouse monoclonal               | 1:5,000  | Santa Cruz Biotechnology  |
| BrdU (B44; for detection of IdU)     | Mouse monoclonal               | 1:50     | BD BioScience             |
| BrdU (BU1/75; for detection of CldU) | Rat monoclonal                 | 1:100    | Novus                     |
| Cleaved-CASP3 (D175) (5A1E)          | Rabbit monoclonal              | 1:1,000  | Cell Signaling Technology |
| CDH1 (24E10)                         | Rabbit polyclonal              | 1:1,000  | Cell Signaling Technology |
| CDH1 (36)                            | Mouse monoclonal               | 1:500    | BD BioScience             |
| CDH2 (D4R1H)                         | Rabbit monoclonal              | 1:1,000  | Cell Signaling Technology |
| CK19 (RCK108)                        | Mouse monoclonal               | 1:500    | Dako                      |
| H2AX p-S139 (20E3)                   | Rabbit monoclonal              | 1:1,000  | Cell Signaling Technology |
| KI67 (SP6)                           | Rabbit monoclonal              | 1:1,000  | Thermo Fisher Scientific  |
| Mouse IgG                            | HRP-conjugated Rabbit          | 1:5,000  | Dako                      |
| Mouse IgG                            | Alexa Fluor 488 dye-conjugated | 1:500    | Thermo Fisher Scientific  |
| Mouse IgG                            | Alexa Fluor 555 dye-conjugated | 1:250    | Thermo Fisher Scientific  |
| Mouse IgG                            | Alexa Fluor 568 dye-conjugated | 1:500    | Thermo Fisher Scientific  |
| P53 (C12)                            | Mouse monoclonal               | 1:1,000  | Cell Signaling Technology |
| P53 p-S15 (D4S1H)                    | Rabbit monoclonal              | 1:1,000  | Cell Signaling Technology |
| PARP                                 | Rabbit polyclonal              | 1:1,000  | Cell Signaling Technology |
| PCNA (PC10)                          | Mouse monoclonal               | 1:1,000  | Santa Cruz Biotechnology  |
| Rabbit IgG                           | HRP-conjugated Goat            | 1:5,000  | Santa Cruz Biotechnology  |
| Rabbit IgG                           | Alexa Fluor 488 dye-conjugated | 1:500    | Thermo Fisher Scientific  |
| Rat IgG                              | Alexa Fluor 488 dye-conjugated | 1:400    | Thermo Fisher Scientific  |
| Rabbit IgG                           | Alexa Fluor 568 dye-conjugated | 1:500    | Thermo Fisher Scientific  |
| VIM (D21H3)                          | Rabbit monoclonal              | 1:1,000  | Cell Signaling Technology |

## Supplementary Table 4

| Lineage                                            | CD3-Bio       | CD11b-Bio    | B220-Bio      | Gr1-Bio            | TER-119-Bio        | CD5-Bio       |
|----------------------------------------------------|---------------|--------------|---------------|--------------------|--------------------|---------------|
| <b>Common lymphoid progenitors (CLP)</b>           | Lineage*      | CD127-AF700  | c-Kit-APC-Cy7 | Sca-1-BV605        |                    |               |
| <b>Common myeloid progenitors (CMP)</b>            | Lineage*      | CD127-AF700* | c-Kit-APC-Cy7 | Sca-1-BV605*       | CD34-eFluor660     | CD16/32-FITC* |
| <b>Megakaryocyte-erythrocyte progenitors (MEP)</b> | Lineage*      | CD127-AF700* | c-Kit-APC-Cy7 | Sca-1-BV605*       | CD34-eFluor660*    | CD16/32-FITC* |
| <b>Granulocyte-macrophage progenitors (GMP)</b>    | Lineage*      | CD127-AF700* | c-Kit-APC-Cy7 | Sca-1-BV605*       | CD34-eFluor660     | CD16/32-FITC  |
| <b>CD3<sup>+</sup> T cells</b>                     | CD3-FITC      |              |               |                    |                    |               |
| <b>B cells</b>                                     | CD3-FITC*     | B220-Bio     | CD19-PE       | Streptavidin-BV605 |                    |               |
| <b>NK cells</b>                                    | CD3-FITC*     | NKp46-APC    |               |                    |                    |               |
| <b>Macrophages</b>                                 | CD11b-PE-Cy7  | F4/80-PE     | CD68-AF700    |                    |                    |               |
| <b>Neutrophils</b>                                 | CD11b-PE-Cy7  | Gr1-Bio      | Ly6b-FITC     | F4/80-PE*          | Streptavidin-BV605 |               |
| <b>Myeloid dendritic cells (mDCs)</b>              | CD11b-PE-Cy7  | CD11c-APC    | CD80-PE       | CD86-FITC          |                    |               |
| <b>Plasmacytoid dendritic cells (pDCs)</b>         | CD11b-PE-Cy7* | CD11c-APC    | B220-Bio      | Streptavidin-BV605 |                    |               |



## Supplementary Table 5

| Antibody     | Conjugate    | Vendor         | Clone    |
|--------------|--------------|----------------|----------|
| CD3e         | Biotin (Bio) | eBioscience    | 145-2C11 |
| CD3e         | FITC         | eBioscience    | 145-2C11 |
| CD5          | Bio          | BD Biosciences | 53-7.3   |
| CD11b        | Bio          | eBioscience    | M1/70    |
| CD11b        | PE-Cy7       | eBioscience    | M1/70    |
| CD11c        | APC          | eBioscience    | N418     |
| CD16/32      | FITC         | eBioscience    | 93       |
| CD19         | PE           | BD Biosciences | 1D3      |
| CD34         | eFluor660    | eBioscience    | RAM34    |
| CD68         | AF700        | AbD Serotec    | FA-11    |
| CD80         | PE           | BD Biosciences | 16-10A1  |
| CD86         | FITC         | BD Biosciences | GL1      |
| CD127        | AF700        | eBioscience    | A7R34    |
| c-Kit        | APC-Cy7      | eBioscience    | 2B8      |
| B220         | Bio          | BD Biosciences | RA3-6B2  |
| F4/80        | PE           | eBioscience    | BM8      |
| Gr1          | Bio          | BioLegend      | RB6-8C5  |
| Ly6b         | FITC         | Miltenyi       | REA115   |
| NKp46        | APC          | eBioscience    | 29A1.4   |
| Sca-1        | BV605        | BioLegend      | D7       |
| TER-119      | Bio          | BioLegend      | TER-119  |
| Streptavidin | BV605        | BioLegend      |          |
| Streptavidin | PE-TexasRed  | BD Biosciences |          |
